# Supplementary material for: Protease profiling using a fluorescent domino peptide cocktail
Source: Royal Society of Chemistry journal article supplement (doi:10.1039/b419446b), 2005-04-12
Supplement: b419446b.pdf [file b419446b.pdf]

## Protease Profiling Using a Fluorescent Domino Peptide Cocktail

Yang Yongzheng and Jean-Louis Reymond\*

*Department of Chemistry & Biochemistry, University of Berne, Freiestrasse 3, 3012 Berne, Switzerland*

E-mail: [jean-louis.reymond@ioc.unibe.ch](mailto:jean-louis.reymond@ioc.unibe.ch)

FAX: +41 31 631 80 57

### Supporting Information

- Data for reference fragments
- MS-traces of cocktail peptides
- HPLC traces of cocktail references and protease fingerprints

**1P1 (\*KDESY):** Starting with 70 mg of Fmoc-Tyr<sub>(t-bu)</sub>-Wang resin (0.044 mmol), Fmoc-type spps followed by cleavage and purification by preparative RP-HPLC gave AAC-KDESY-OH (15.1 mg, 0.018 mmol, 41 %) as colorless foamy solid. ESI<sup>+</sup>-MS: calc. for C<sub>38</sub>H<sub>46</sub>N<sub>6</sub>O<sub>16</sub> [M+H]<sup>+</sup>: 843.3048, found 843.3072.

**1P2 (\*KDES):** Starting with 70 mg of Fmoc-Ser<sub>(t-bu)</sub>-Wang resin (0.044 mmol), Fmoc-type spps followed by cleavage and purification by preparative RP-HPLC gave AAC-KDES-OH (15.0 mg, 0.022 mmol, 50 %) as colorless foamy solid. ESI<sup>+</sup>-MS: calc. for C<sub>29</sub>H<sub>38</sub>N<sub>5</sub>O<sub>14</sub> [M+H]<sup>+</sup>: 680.2415, found 680.2421.

**1P3 (\*KDE):** Starting with 80 mg of Fmoc-Glu<sub>(ot-bu)</sub>-Wang resin (0.043 mmol), Fmoc-type spps followed by cleavage and purification by preparative RP-HPLC gave AAC-KDE-OH (18.3 mg, 0.025 mmol, 58 %) as colorless foamy solid. ESI<sup>+</sup>-MS: calc. for C<sub>26</sub>H<sub>32</sub>N<sub>4</sub>O<sub>12</sub> [M+H]<sup>+</sup>: 593.2094, found 593.2090.

**1P4 (\*KD):** Starting with 70 mg of Fmoc-Asp<sub>(ot-bu)</sub>-Wang resin (0.042 mmol), Fmoc-type spps followed by cleavage and purification by preparative RP-HPLC gave AAC-KD-OH (11.8 mg, 0.025 mmol, 60 %) as colorless foamy solid. ESI<sup>+</sup>-MS: calc. for C<sub>21</sub>H<sub>26</sub>N<sub>3</sub>O<sub>9</sub> [M+H]<sup>+</sup>: 464.1669, found 464.1678.

**1P5 (\*K):** Starting with 70 mg of Fmoc-Lys<sub>(boc)</sub>-Wang resin (0.046 mmol), Fmoc-type spps followed by cleavage and purification by preparative RP-HPLC gave AAC-K-OH (4.2 mg, 0.012 mmol, 26 %) as colorless foamy solid. ESI<sup>+</sup>-MS: calc. for C<sub>17</sub>H<sub>21</sub>N<sub>2</sub>O<sub>6</sub> [M+H]<sup>+</sup>: 349.1399, found 349.1393.

**2P1 (\*AVPER):** Starting with 70 mg of Fmoc-Arg<sub>(pbf)</sub>-Wang resin (0.046 mmol), Fmoc-type spps followed by cleavage and purification by preparative RP-HPLC gave AAC-AVPER-OH

(17.4 mg, 0.023 mmol, 50 %) as colorless foamy solid. ESI<sup>+</sup>-MS: calc. for C<sub>35</sub>H<sub>49</sub>N<sub>8</sub>O<sub>12</sub> [M+H]<sup>+</sup>: 773.3469, found 773.3467.

**2P2 (\*AVPE):** Starting with 70 mg of Fmoc- Glu<sub>(ot-bu)</sub>-Wang resin (0.043 mmol), Fmoc-type spps followed by cleavage and purification by preparative RP-HPLC gave AAC-AVPE-OH (5.8 mg, 0.0094 mmol, 22 %) as colorless foamy solid. ESI<sup>+</sup>-MS: calc. for C<sub>29</sub>H<sub>35</sub>N<sub>4</sub>O<sub>11</sub> (Na<sup>+</sup>) [M+H]<sup>+</sup>: 639.2278, found 639.2268.

**2P3 (\*AVP):** Starting with 70 mg of Fmoc-Pro-Wang resin (0.063 mmol), Fmoc-type spps followed by cleavage and purification by preparative RP-HPLC gave AAC-AVP-OH (2 mg, 0.004 mmol, 6 %) as colorless foamy solid. ESI<sup>+</sup>-MS: calc. for C<sub>24</sub>H<sub>29</sub>N<sub>3</sub>O<sub>8</sub> (Na<sup>+</sup>) [M+H]<sup>+</sup>: 510.1852, found 510.1867.

**2P4 (\*AV):** Starting with 100 mg of Fmoc-Val-Wang resin (0.051 mmol), Fmoc-type spps followed by cleavage and purification by preparative RP-HPLC gave AAC-AV-OH (11.5 mg, 0.029 mmol, 57 %) as colorless foamy solid. ESI<sup>+</sup>-MS: calc. for C<sub>19</sub>H<sub>22</sub>N<sub>2</sub>O<sub>7</sub> [M+H]<sup>+</sup>: 390.142701, found 390.143070.

**2P5 (\*A):** Starting with 130 mg of Fmoc-Ala-Wang resin (0.042 mmol), Fmoc-type spps followed by cleavage and purification by preparative RP-HPLC gave AAC-A-OH (3.9 mg, 0.013 mmol, 31 %) as colorless foamy solid. ESI<sup>+</sup>-MS: calc. for C<sub>14</sub>H<sub>13</sub>N<sub>1</sub>O<sub>6</sub> [M+H]<sup>+</sup>: 290.074287, found 290.074220.

**3P1 (\*EFVGS):** Starting with 70 mg of Fmoc- Ser<sub>(t-bu)</sub>-Wang resin (0.044 mmol), Fmoc-type spps followed by cleavage and purification by preparative RP-HPLC gave AAC-EFVGS-OH (8.0 mg, 0.011 mmol, 25 %) as colorless foamy solid. ESI<sup>+</sup>-MS: calc. for C<sub>35</sub>H<sub>41</sub>N<sub>5</sub>O<sub>13</sub> [M+H]<sup>+</sup>: found 739.5828.

**3P2 (\*EFVG):** Starting with 70 mg of Fmoc- Gly-Wang resin (0.046 mmol), Fmoc-type spps followed by cleavage and purification by preparative RP-HPLC gave AAC-EFVG-OH (11.0 mg, 0.017 mmol, 37 %) as colorless foamy solid. ESI<sup>+</sup>-MS: calc. for C<sub>32</sub>H<sub>36</sub>N<sub>4</sub>O<sub>11</sub>Na [M+H]<sup>+</sup>: 675.2278, found 675.2298.

**3P3 (\*EFV):** Starting with 100 mg of Fmoc-Val-Wang resin (0.051 mmol), Fmoc-type spps followed by cleavage and purification by preparative RP-HPLC gave AAC-EFV-OH (9.0 mg, 0.015 mmol, 29 %) as colorless foamy solid. ESI<sup>+</sup>-MS: calc. for C<sub>30</sub>H<sub>33</sub>N<sub>3</sub>O<sub>10</sub> [M+H]<sup>+</sup>: 596.2244, found 596.2274.

**3P4 (\*EF):** Starting with 61 mg of Fmoc-Phe-Wang resin (0.061 mmol), Fmoc-type spps followed by cleavage and purification by preparative RP-HPLC gave AAC-EF-OH (13.8 mg, 0.028 mmol, 46 %) as colorless foamy solid. ESI<sup>+</sup>-MS: calc. for C<sub>25</sub>H<sub>25</sub>N<sub>2</sub>O<sub>9</sub> [M+H]<sup>+</sup>: 497.1560, found 497.1577.

**3P5 (\*E):** Starting with 80 mg of Fmoc- Glu<sub>(ot-bu)</sub>-Wang resin (0.043 mmol), Fmoc-type spps followed by cleavage and purification by preparative RP-HPLC gave AAC-E-OH (12.0 mg, 0.034 mmol, 79 %) as colorless foamy solid. ESI<sup>+</sup>-MS: calc. for C<sub>16</sub>H<sub>16</sub>N<sub>1</sub>O<sub>8</sub> [M+H]<sup>+</sup>: 349.079767, found 349.081210.

**4P1 (\*YARKL):** Starting with 70 mg of Fmoc- Leu -Wang resin (0.043 mmol), Fmoc-type spps followed by cleavage and purification by preparative RP-HPLC gave AAC-YARKL-OH (15.8 mg, 0.019 mmol, 44 %) as colorless foamy solid. ESI<sup>+</sup>-MS: calc. for C<sub>41</sub>H<sub>58</sub>N<sub>9</sub>O<sub>11</sub> [M+H]<sup>+</sup>: 852.4255, found 852.4249.

**4P2 (\*YARK):** Starting with 69 mg of Fmoc- Lys<sub>(boc)</sub> -Wang resin (0.046 mmol), Fmoc-type spps followed by cleavage and purification by preparative RP-HPLC gave AAC-YARK-OH (23.5 mg, 0.032 mmol, 70 %) as colorless foamy solid. ESI<sup>+</sup>-MS: calc. for C<sub>35</sub>H<sub>47</sub>N<sub>8</sub>O<sub>10</sub> [M+H]<sup>+</sup>: 739.3412, found 739.3398.

**4P3 (\*YAR):** Starting with 79 mg of Fmoc- Arg<sub>(pbf)</sub>-Wang resin (0.046 mmol), Fmoc-type spps followed by cleavage and purification by preparative RP-HPLC gave AAC-YAR-OH (16 mg, 0.026 mmol, 57 %) as colorless foamy solid. ESI<sup>+</sup>-MS: calc. for C<sub>29</sub>H<sub>35</sub>N<sub>6</sub>O<sub>9</sub> [M+H]<sup>+</sup>: 611.2465, found 611.2471.

**4P4 (\*YA):** Starting with 130 mg of Fmoc- Ala -Wang resin (0.042 mmol), Fmoc-type spps followed by cleavage and purification by preparative RP-HPLC gave AAC-YA-OH (2.5 mg, 0.0055 mmol, 12 %) as colorless foamy solid. ESI<sup>+</sup>-MS: calc. for C<sub>23</sub>H<sub>22</sub>N<sub>2</sub>O<sub>8</sub>Na [M+H]<sup>+</sup>: 477.1273, found 477.1271.

**4P5 (\*Y):** Starting with 70 mg of Fmoc- Tyr<sub>(t-bu)</sub>-Wang resin (0.044 mmol), Fmoc-type spps followed by cleavage and purification by preparative RP-HPLC gave AAC-Y-OH (5.8 mg, 0.015 mmol, 34 %) as colorless foamy solid. ESI<sup>+</sup>-MS: calc. for C<sub>20</sub>H<sub>18</sub>NO<sub>7</sub> [M+H]<sup>+</sup>: 384.1083, found 384.1087.

**5P1 (\*LKYFD):** Starting with 70 mg of Fmoc- Asp<sub>(ot-bu)</sub>-Wang resin (0.042 mmol), Fmoc-type spps followed by cleavage and purification by preparative RP-HPLC gave AAC-LKYFD-OH (18.4 mg, 0.021 mmol, 50 %) as colorless foamy solid. ESI<sup>+</sup>-MS: calc. for C<sub>45</sub>H<sub>55</sub>N<sub>6</sub>O<sub>13</sub> [M+H]<sup>+</sup>: 887.3827, found 887.3865.

**5P2 (\*LKYF):** Starting with 70 mg of Fmoc- Phe -Wang resin (0.061 mmol), Fmoc-type spps followed by cleavage and purification by preparative RP-HPLC gave AAC-LKYF-OH (20.1 mg, 0.026 mmol, 43 %) as colorless foamy solid. ESI<sup>+</sup>-MS: calc. for C<sub>41</sub>H<sub>50</sub>N<sub>5</sub>O<sub>10</sub> [M+H]<sup>+</sup>: 772.3557, found 772.3538.

**5P3 (\*LKY):** Starting with 70 mg of Fmoc- Tyr<sub>(t-bu)</sub>-Wang resin (0.044 mmol), Fmoc-type spps followed by cleavage and purification by preparative RP-HPLC gave AAC-LKY-OH (11.4 mg, 0.018 mmol, 41 %) as colorless foamy solid. ESI<sup>+</sup>-MS: calc. for C<sub>32</sub>H<sub>41</sub>N<sub>4</sub>O<sub>9</sub> [M+H]<sup>+</sup>: 625.2873, found 625.2897.

**5P4 (\*LK):** Starting with 69 mg of Fmoc- Lys<sub>(boc)</sub>-Wang resin (0.044 mmol), Fmoc-type spps followed by cleavage and purification by preparative RP-HPLC gave AAC-LK-OH (11.4 mg, 0.025 mmol, 57 %) as colorless foamy solid. ESI<sup>+</sup>-MS: calc. for C<sub>23</sub>H<sub>32</sub>N<sub>3</sub>O<sub>7</sub> [M+H]<sup>+</sup>: 462.2260, found 462.2262.

**5P5 (\*L):** Starting with 69 mg of Fmoc- Leu -Wang resin (0.044 mmol), Fmoc-type spps followed by cleavage and purification by preparative RP-HPLC gave AAC-L-OH (2.3 mg, 0.007 mmol, 16 %) as colorless foamy solid. ESI<sup>+</sup>-MS: calc. for C<sub>17</sub>H<sub>20</sub>NO<sub>6</sub> [M+H]<sup>+</sup>: 333.121238, found 333.121190.

**Peptide 1.** ESI<sup>+</sup>-MS: calc. for C<sub>44</sub>H<sub>60</sub>N<sub>11</sub>O<sub>16</sub> [M+H]<sup>+</sup>: 998.4219, found 998.4240.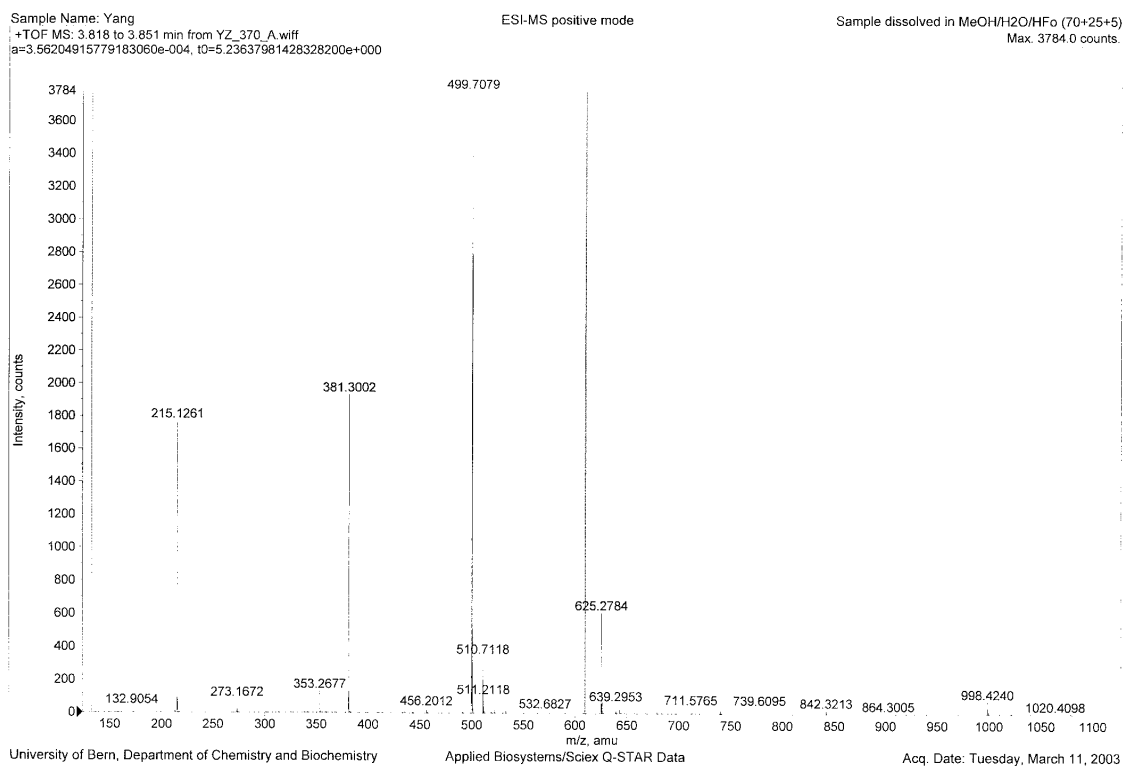**Peptide 2.** ESI<sup>+</sup>-MS: calc. for C<sub>38</sub>H<sub>54</sub>N<sub>9</sub>O<sub>14</sub> [M+H]<sup>+</sup>: 860.3790, found 860.3779.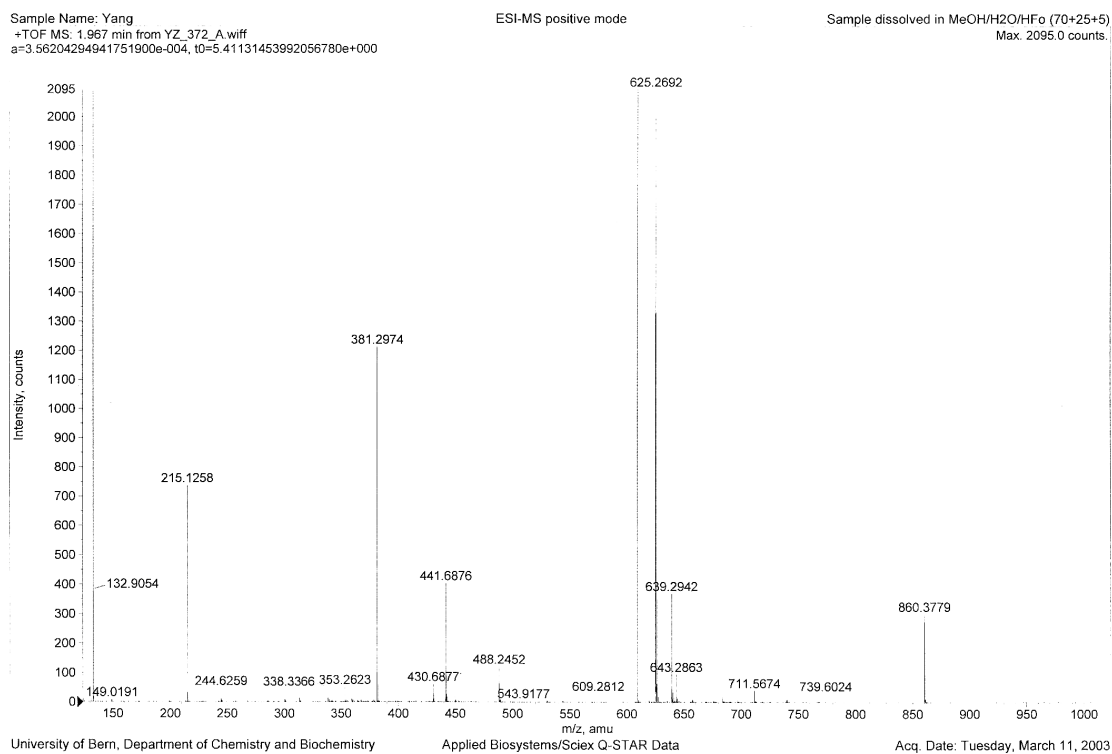

**Peptide 3.** ESI<sup>+</sup>-MS: calc. for C<sub>39</sub>H<sub>47</sub>N<sub>7</sub>O<sub>15</sub> [M+H]<sup>+</sup>: 854.3208, found 854.3215.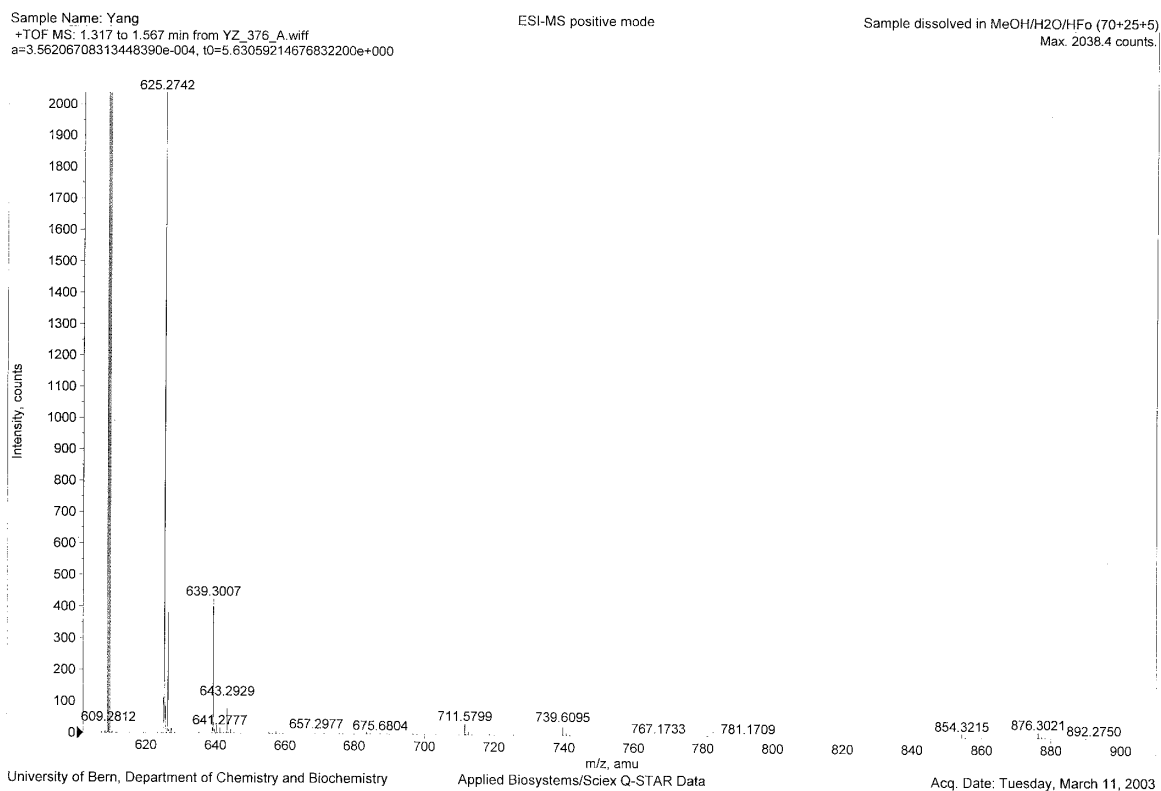**Peptide 4.** ESI<sup>+</sup>-MS: calc. for C<sub>50</sub>H<sub>67</sub>N<sub>10</sub>O<sub>12</sub> [M+H]<sup>+</sup>: 999.4939, found 999.4964.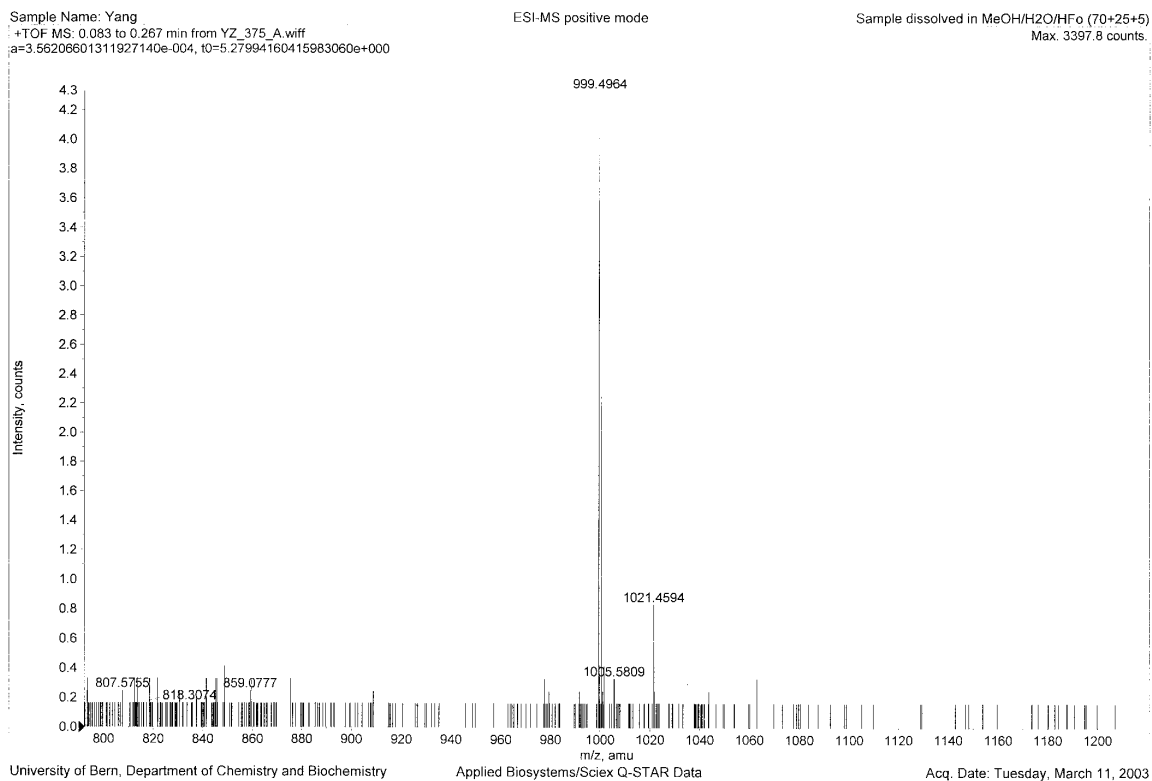



**Peptide 5.** ESI<sup>+</sup>-MS: calc. for C<sub>51</sub>H<sub>67</sub>N<sub>8</sub>O<sub>13</sub> [M+H]<sup>+</sup>: 999.4827, found 999.4796.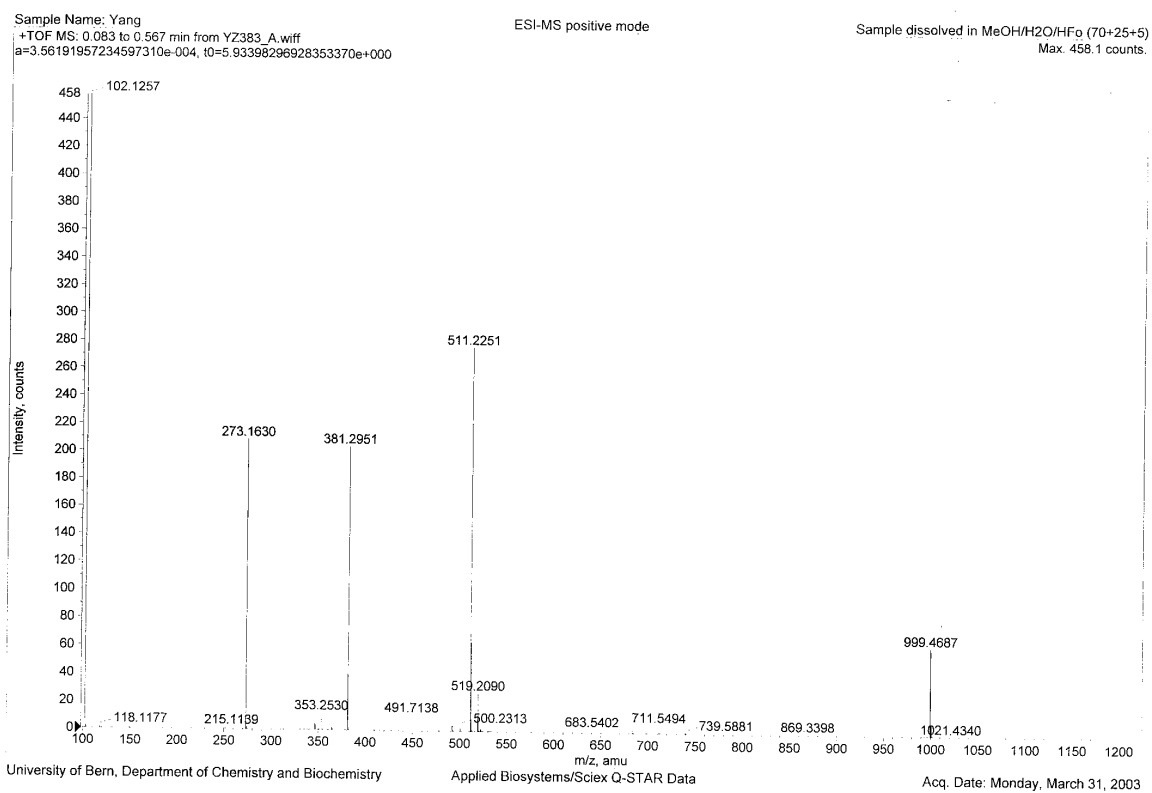

## 1. HPLC Traces for Reference Group 1

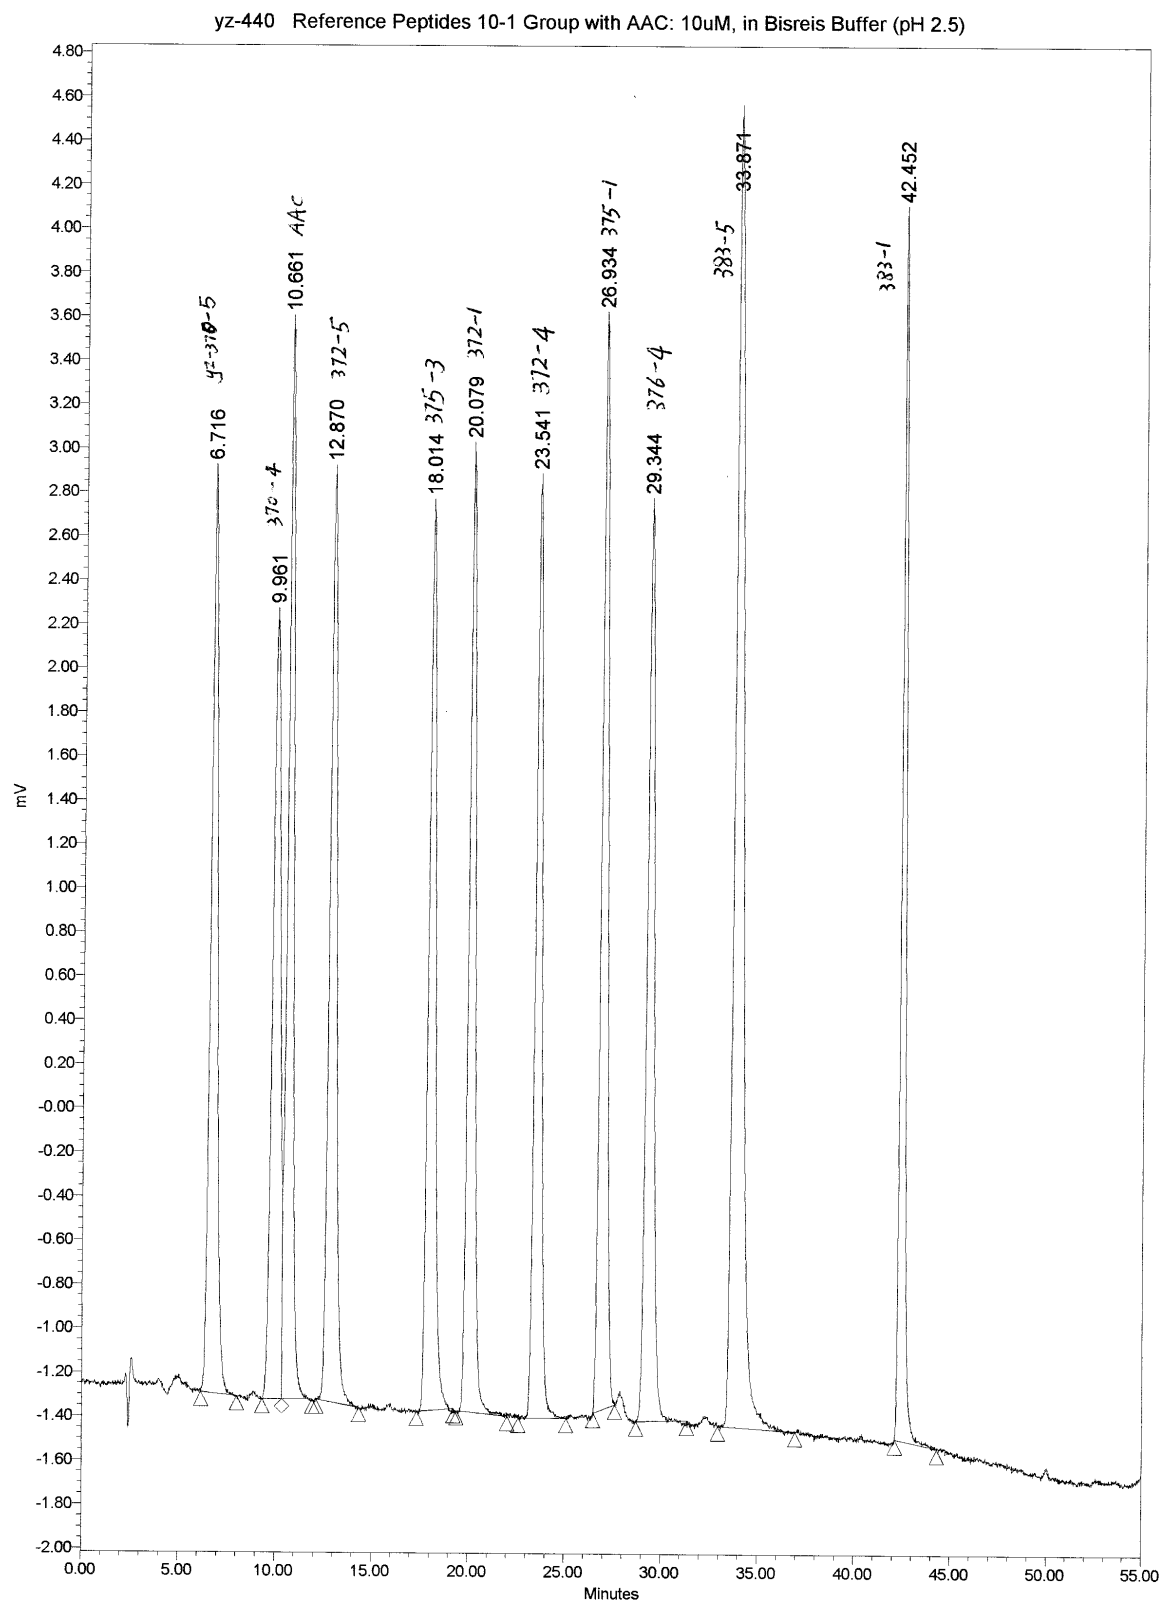

## 2. HPLC Traces for Reference Group 2

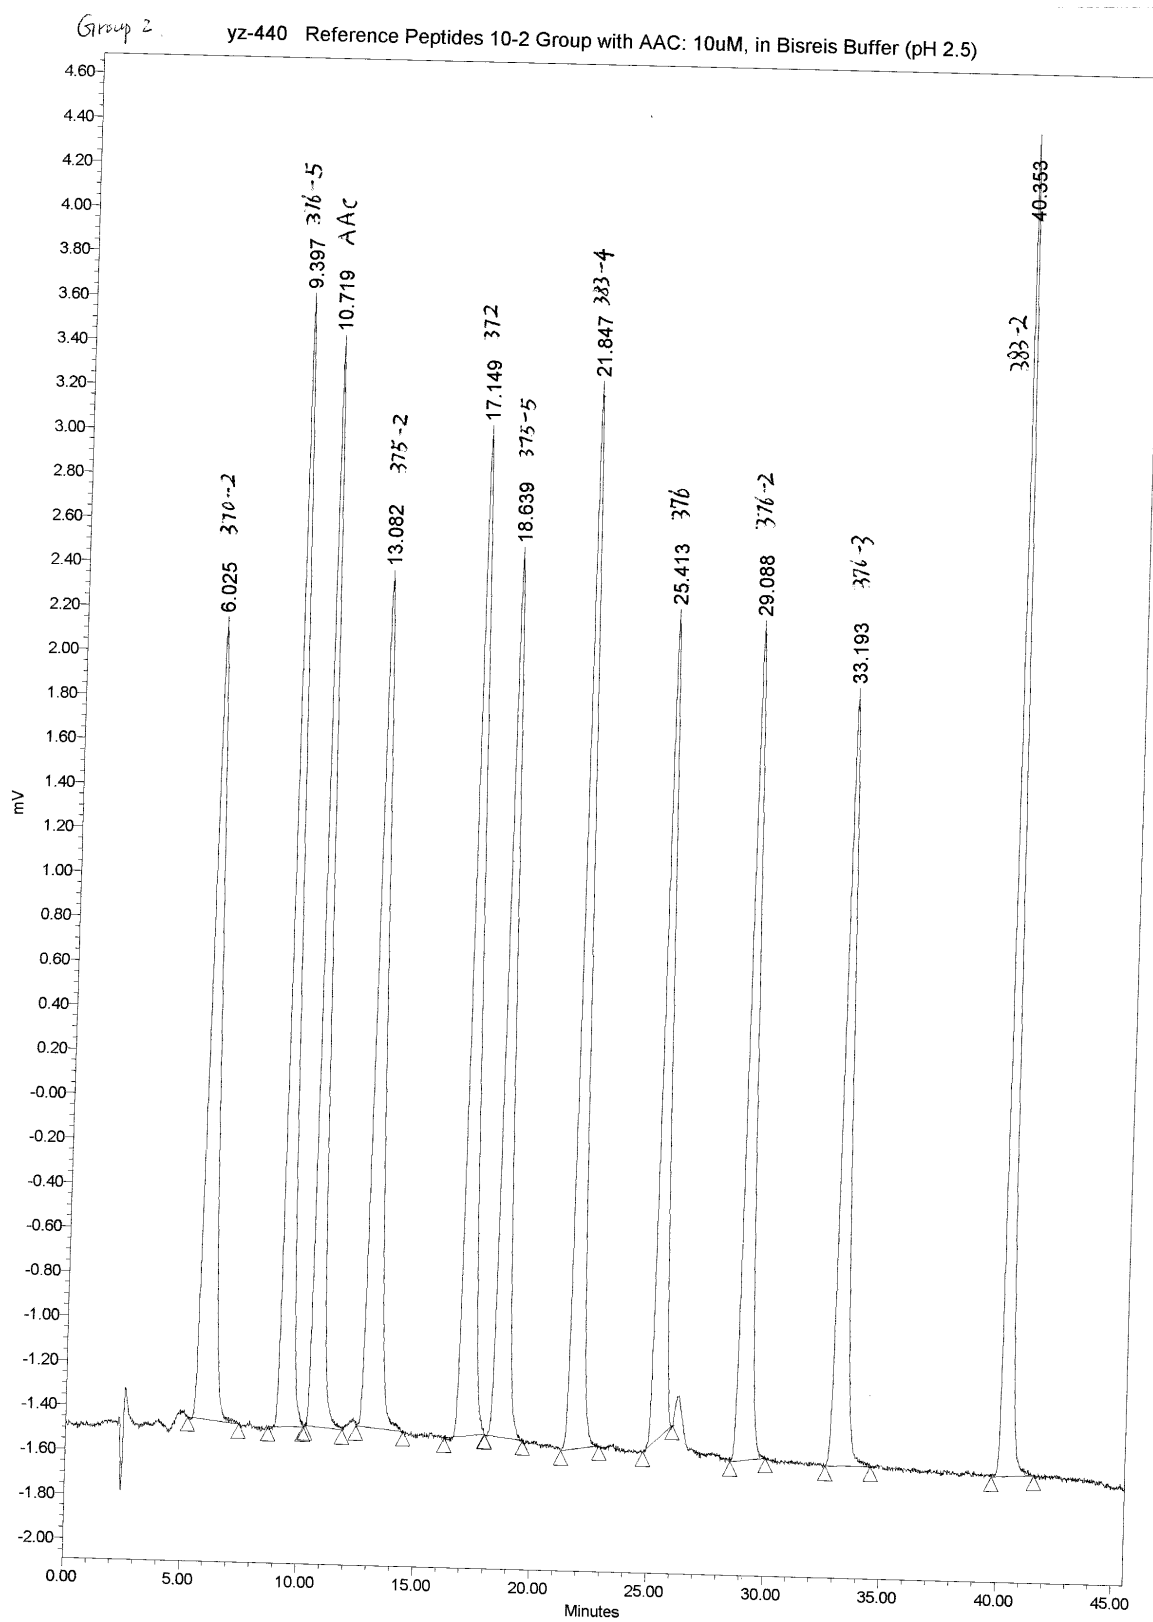

## 3. HPLC Traces for Reference Group 3

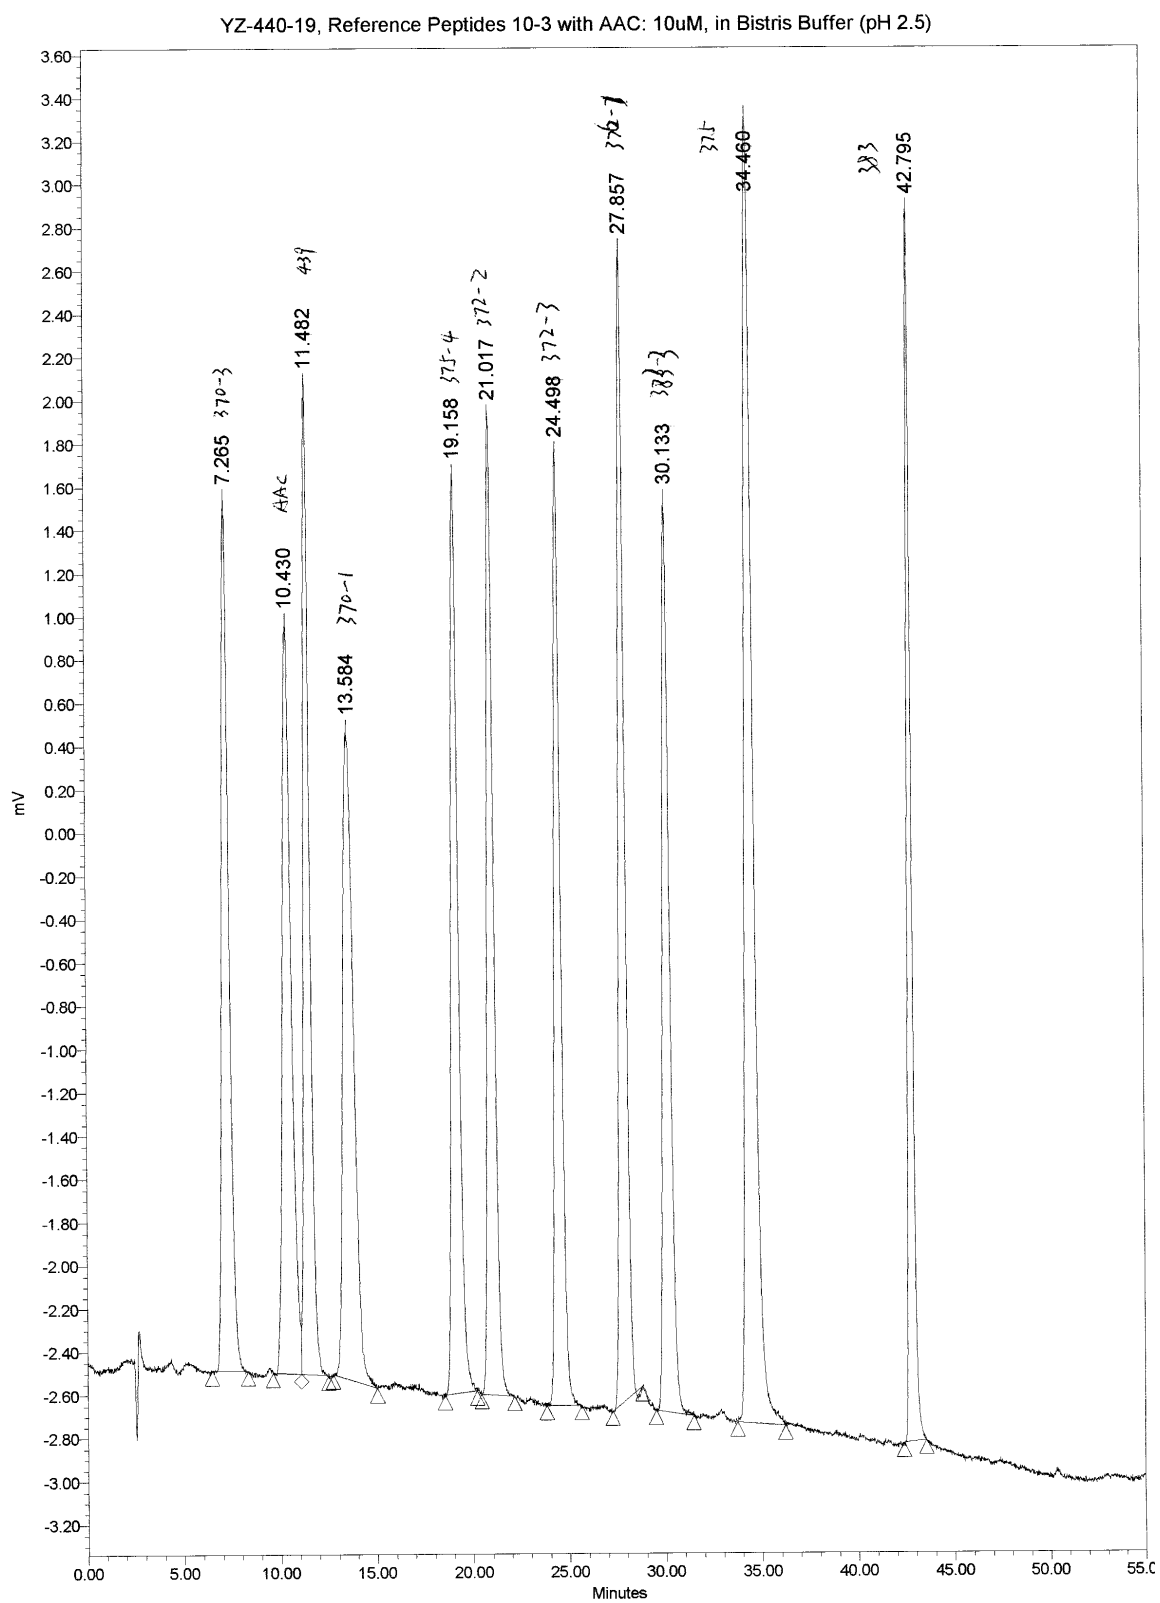

## 4. HPLC Traces for Trypsin

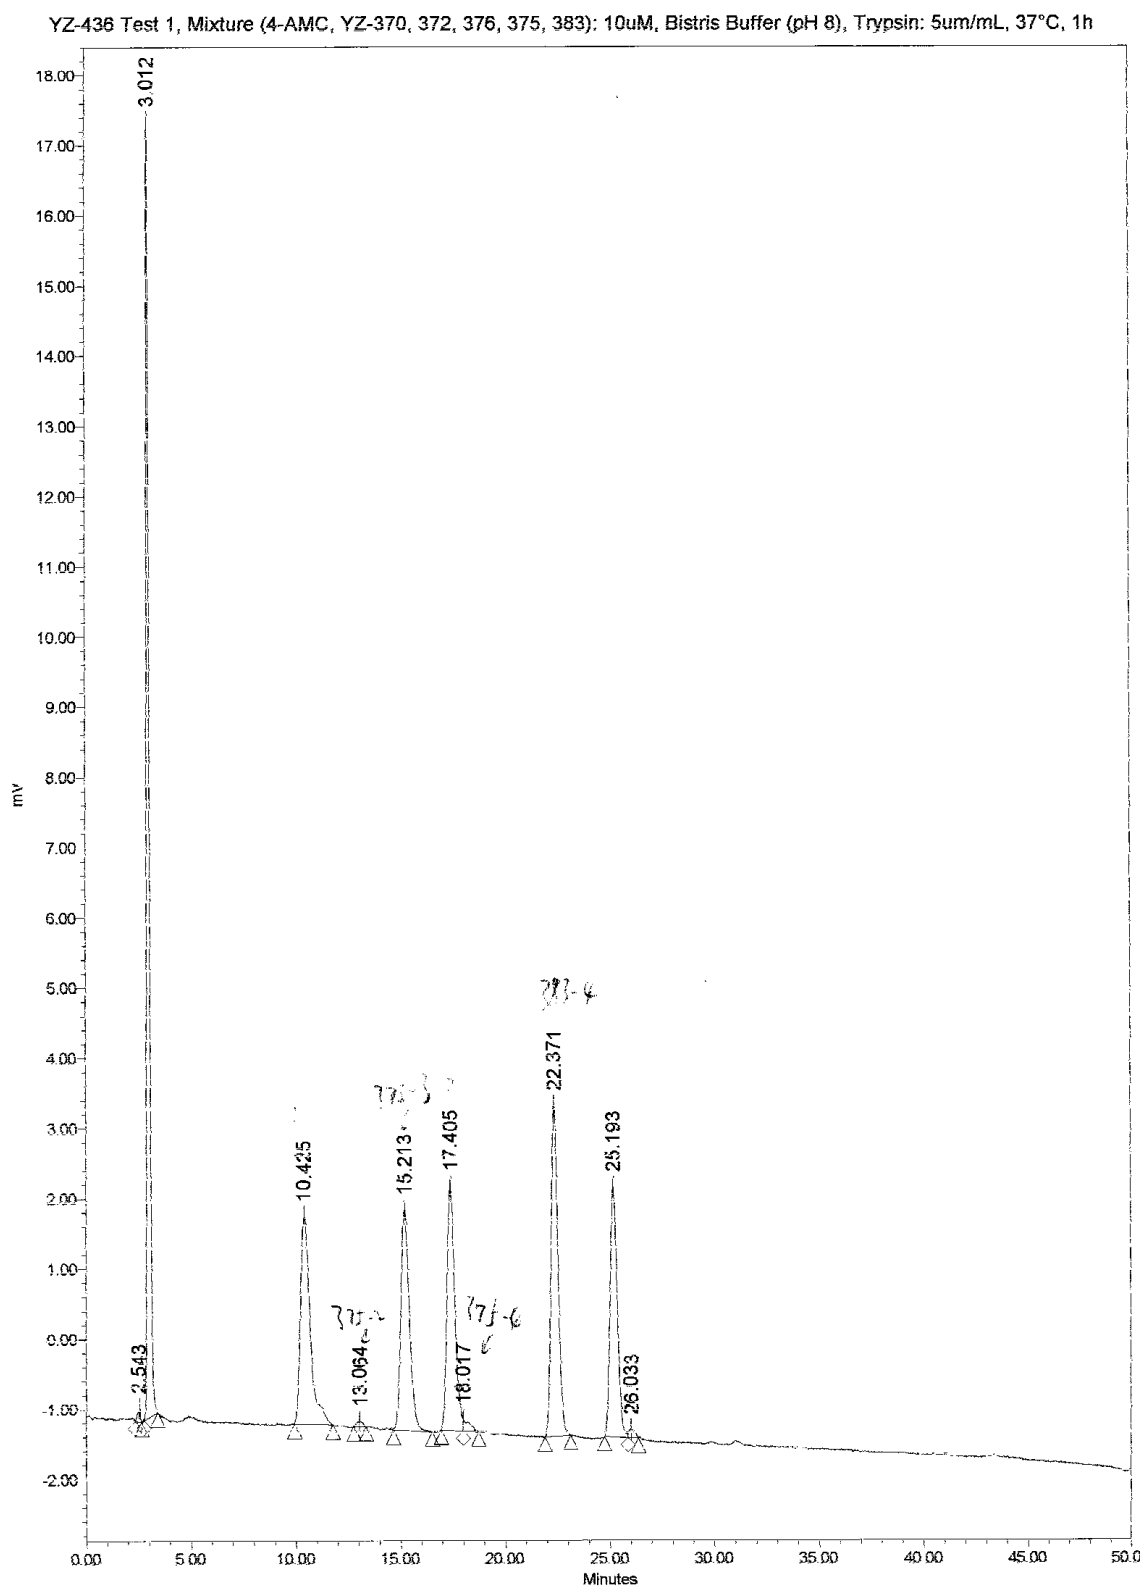

## 5. HPLC Traces for Subtilisin

YZ-436 Test 2, Mixture (4-AMC, YZ-370, 372, 376, 375, 383): 10uM, Bistris Buffer (pH 6.5), Subtilisin: 5um/mL, 37°C, 1h

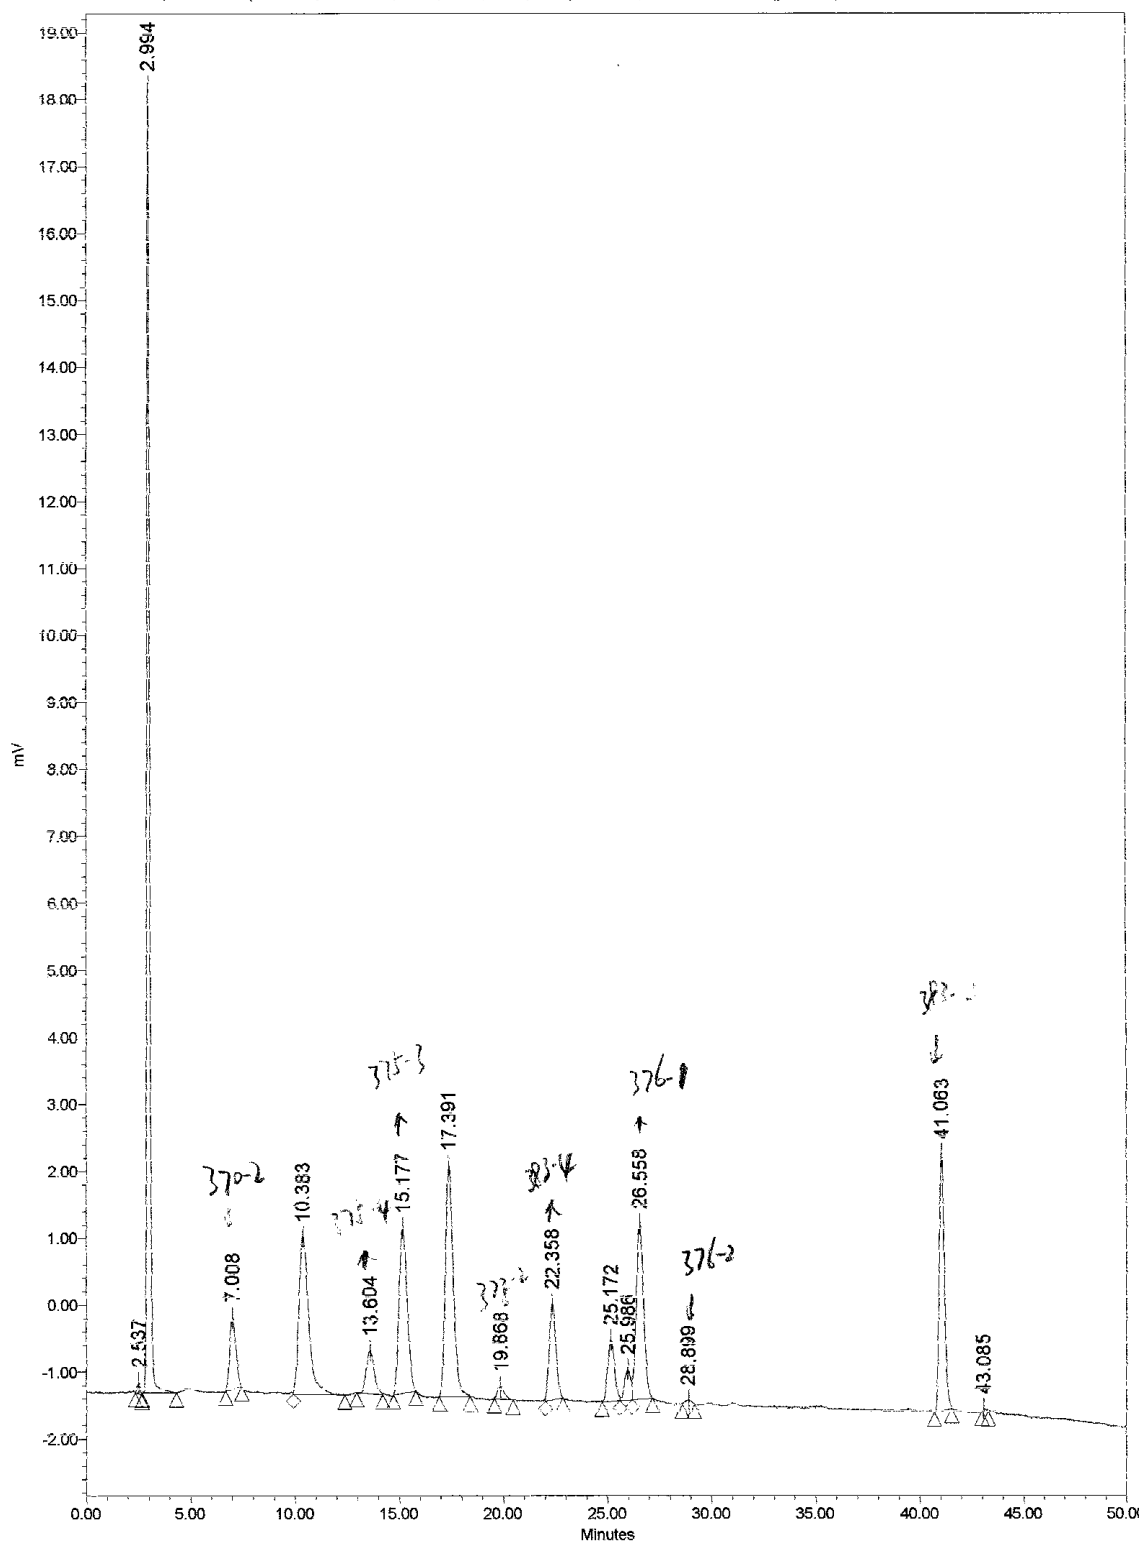

## 6. HPLC Traces for Chmotrypsin

YZ-436 Test 3, Mixture (4-AMC, YZ-370, 372, 376, 375, 383): 10uM, Bistris Buffer (pH 8), Chymotrypsin: 5ug/mL, 37°C, 1h

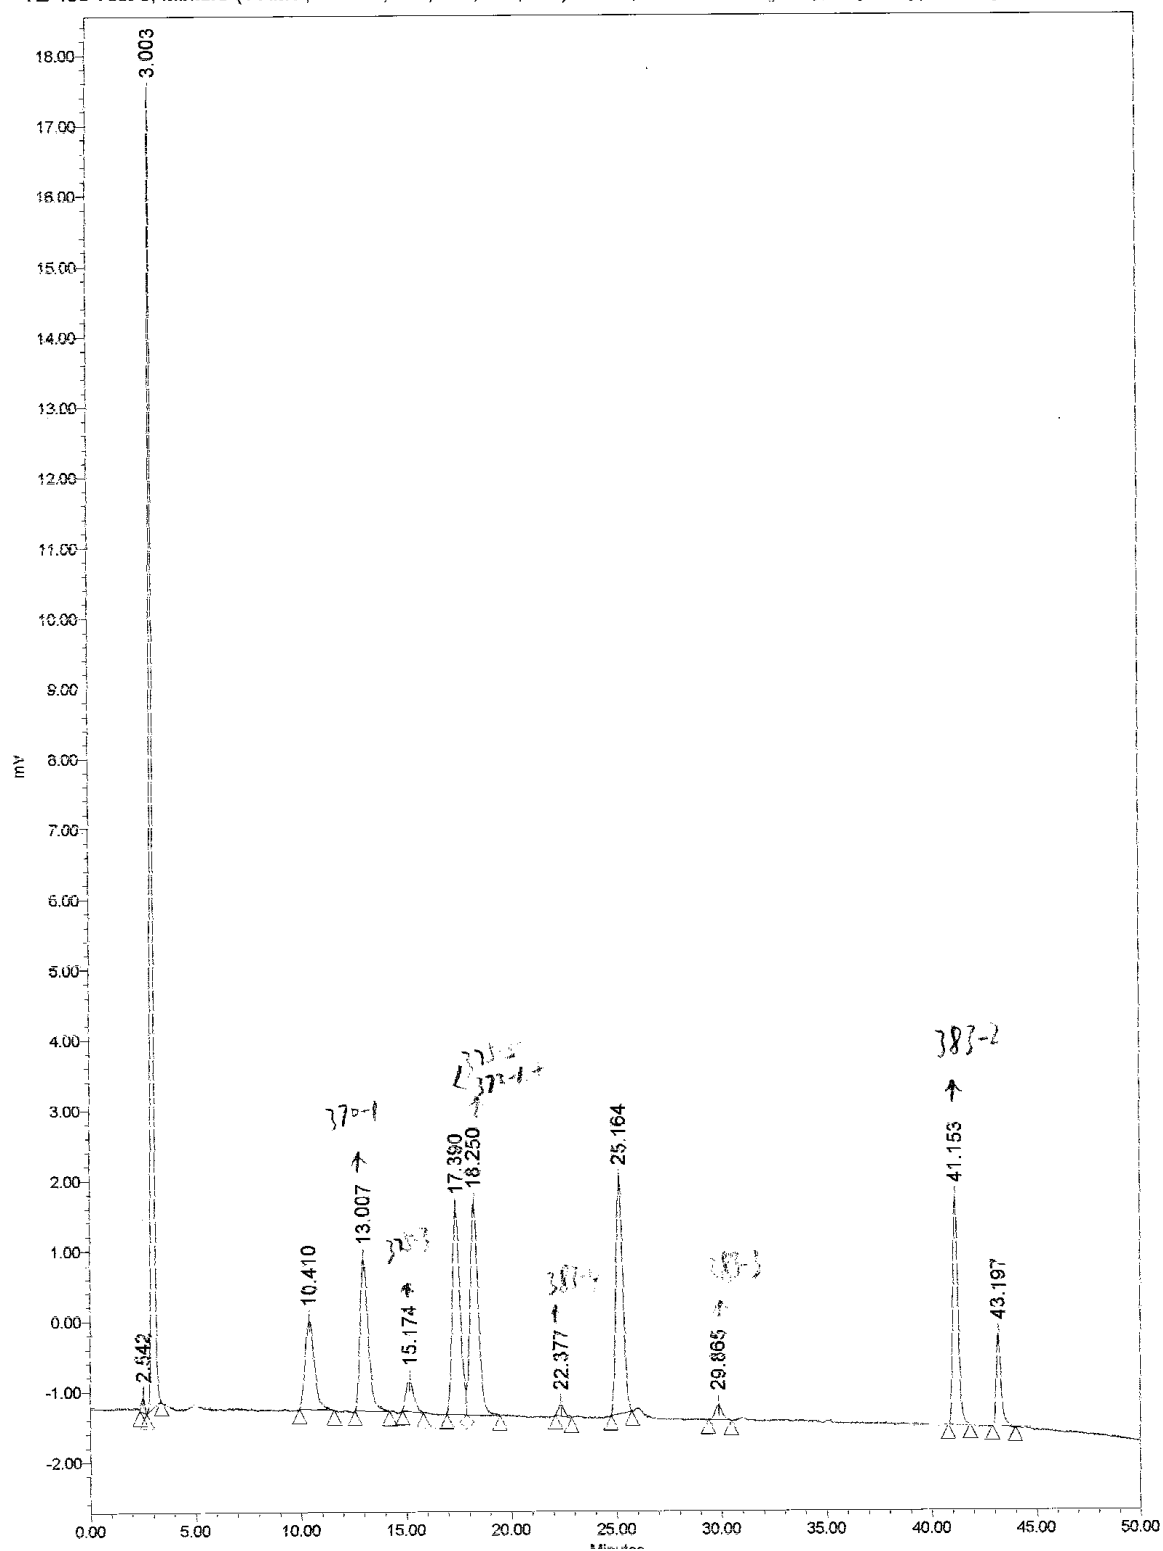

## 7. HPLC Traces for Pepsin

YZ-436 Test 4, Mixture (4-AMC, YZ-370, 372, 376, 375, 383): 10uM, Bistris Buffer (pH 4), Pepsin: 5ug/mL, 37°C, 1h

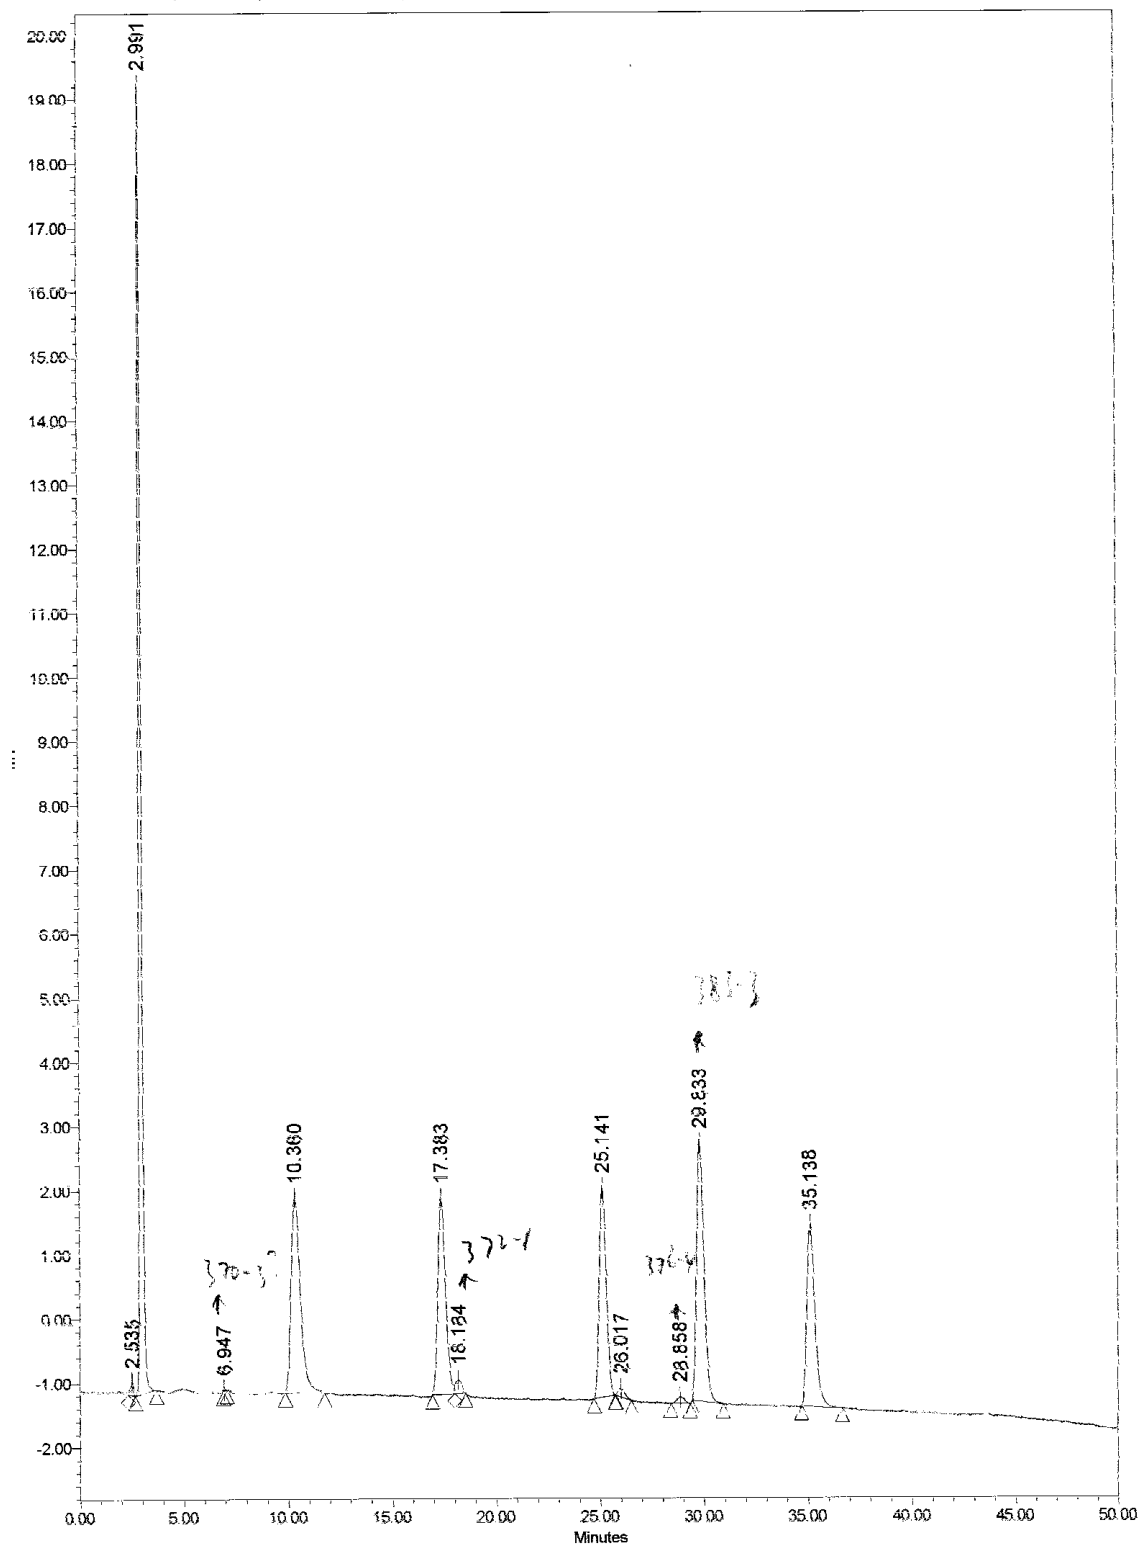



## 8. HPLC Traces for Papain

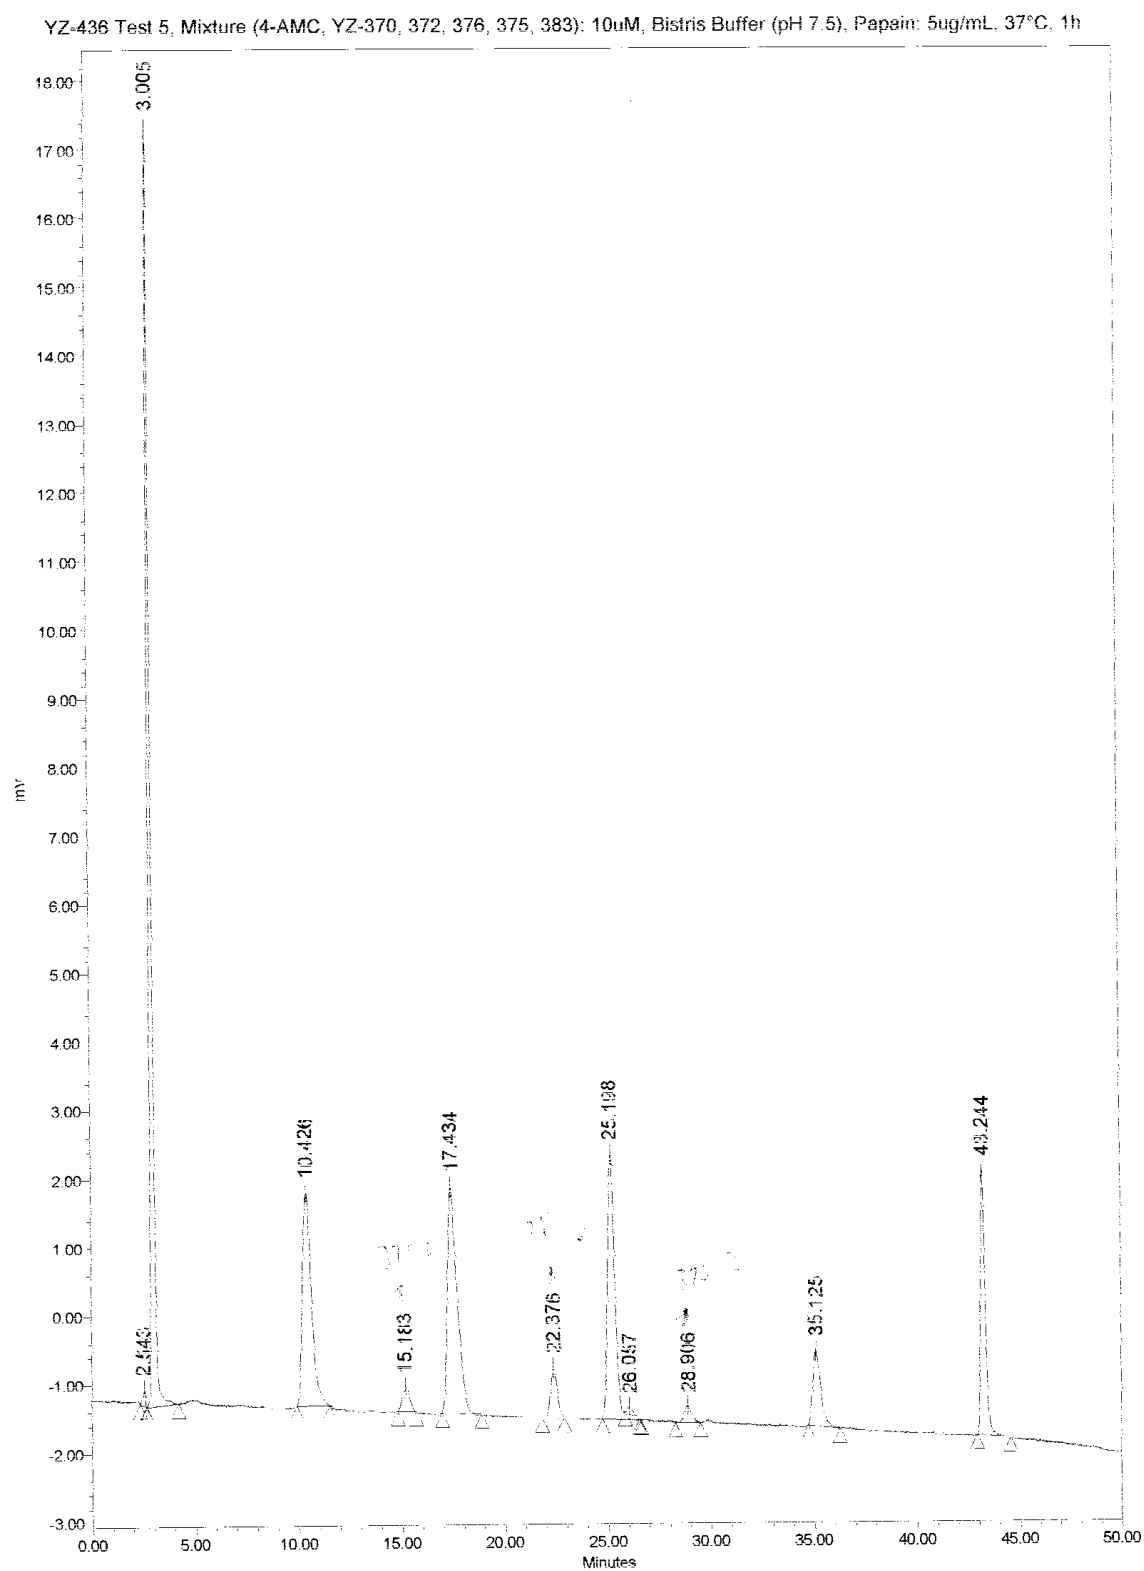

## 9. HPLC Traces for Purified Protease C Wild Type (1h)

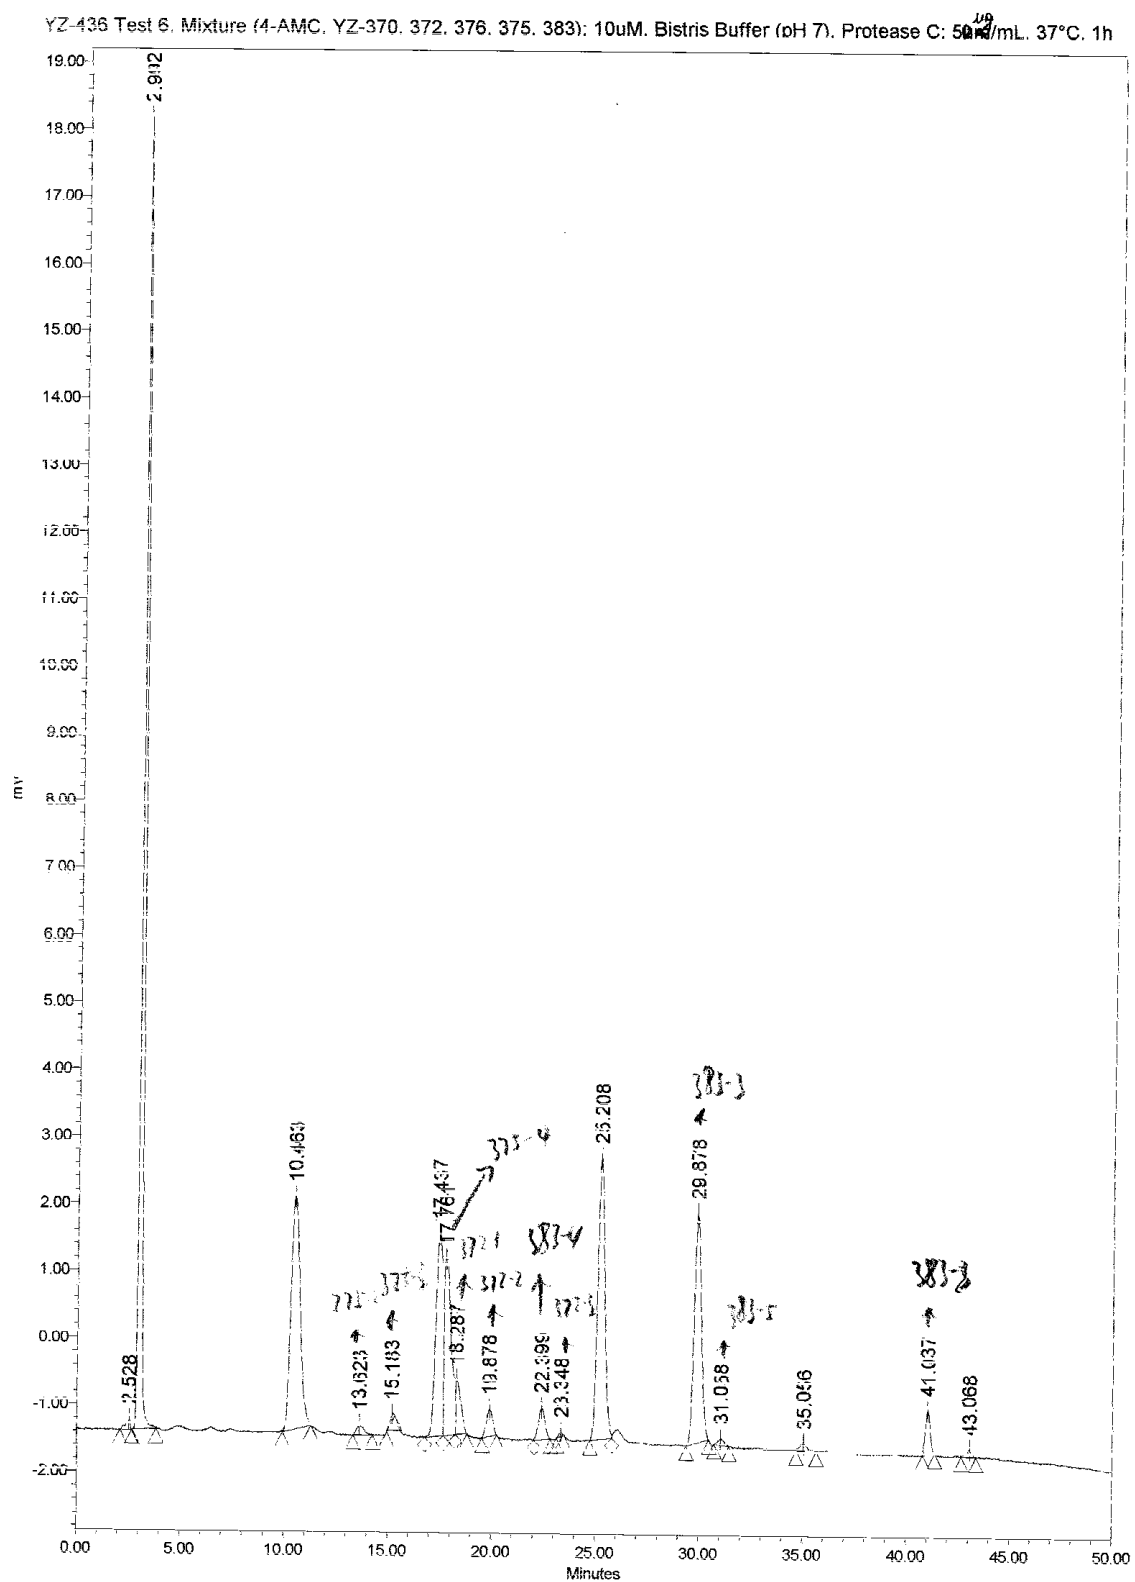

10 HPLC Traces for Protrase C Wild Type (10h)

YZ-436 Test 6, Mixture (4-AMC, YZ-370, 372, 376, 375, 383): 10uM, Bistris Buffer (pH 7), Protease C: 50 <sup>mg</sup>/mL, 37°C, 10h

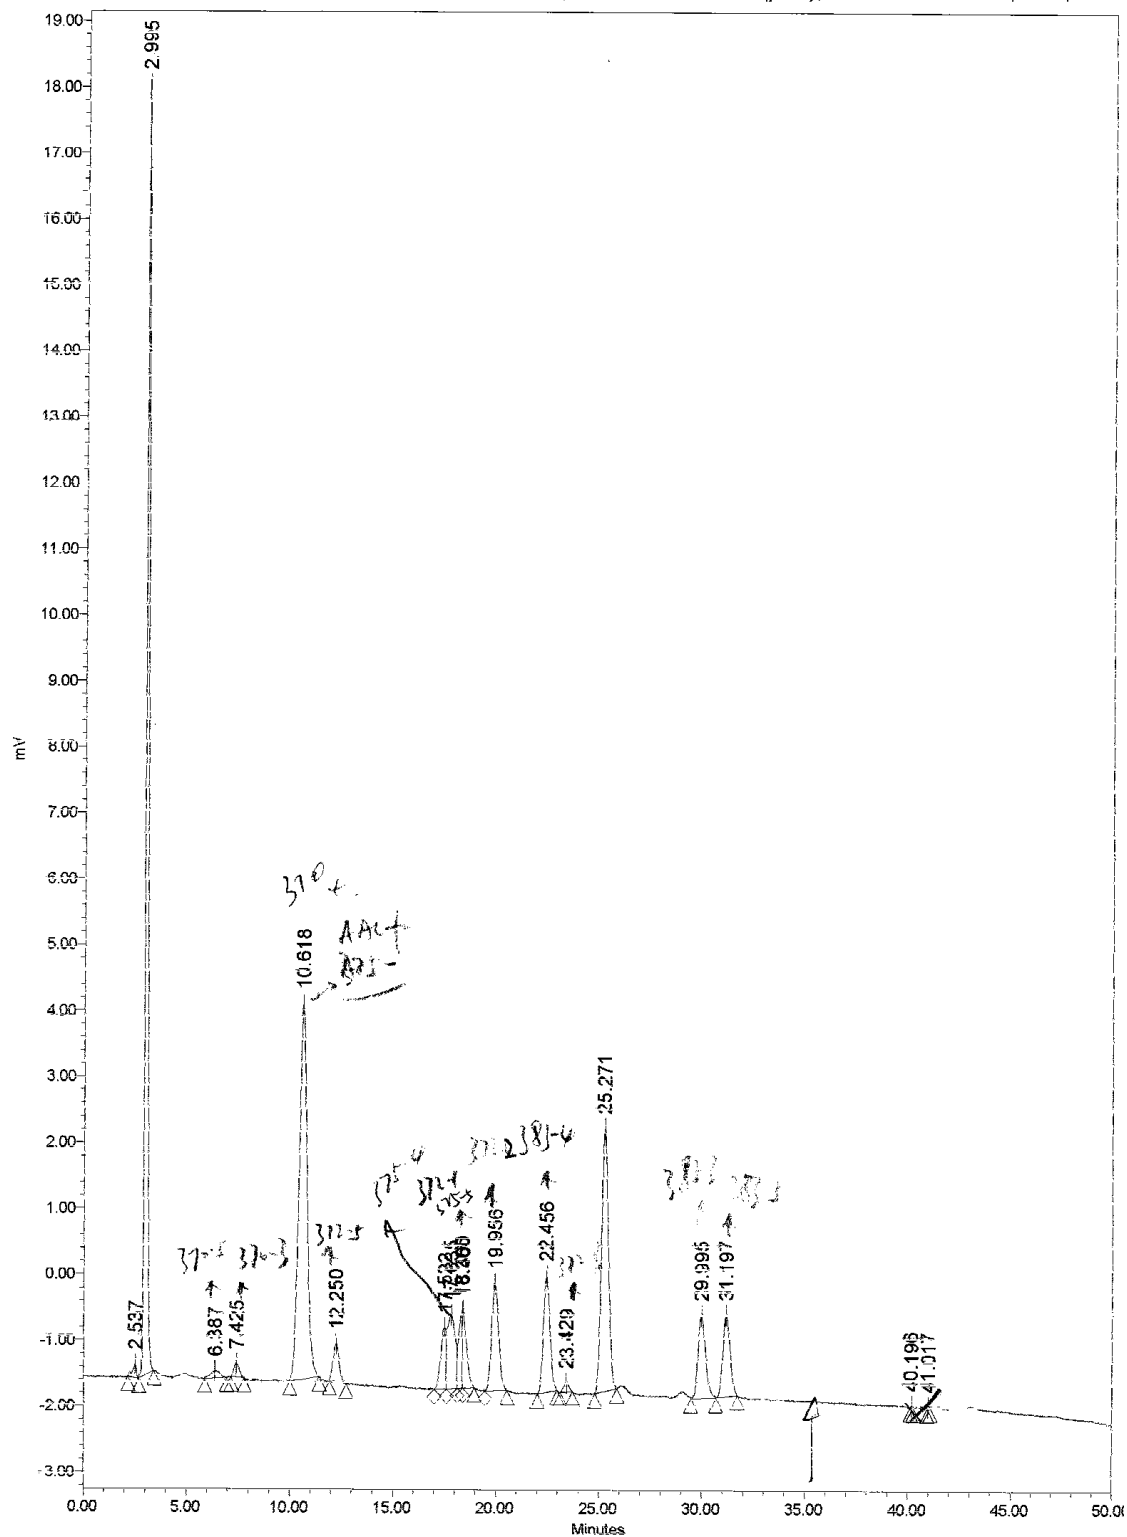

## 11. HPLC Traces for Poteinase K

Measurement Condition: Peptide Mixture Concentration, 10uM; 20 mM Bistris Buffer (pH 9.0); Proteinase K, 50ug/mL; in Tot Volume 100uL; 37°C; 1h

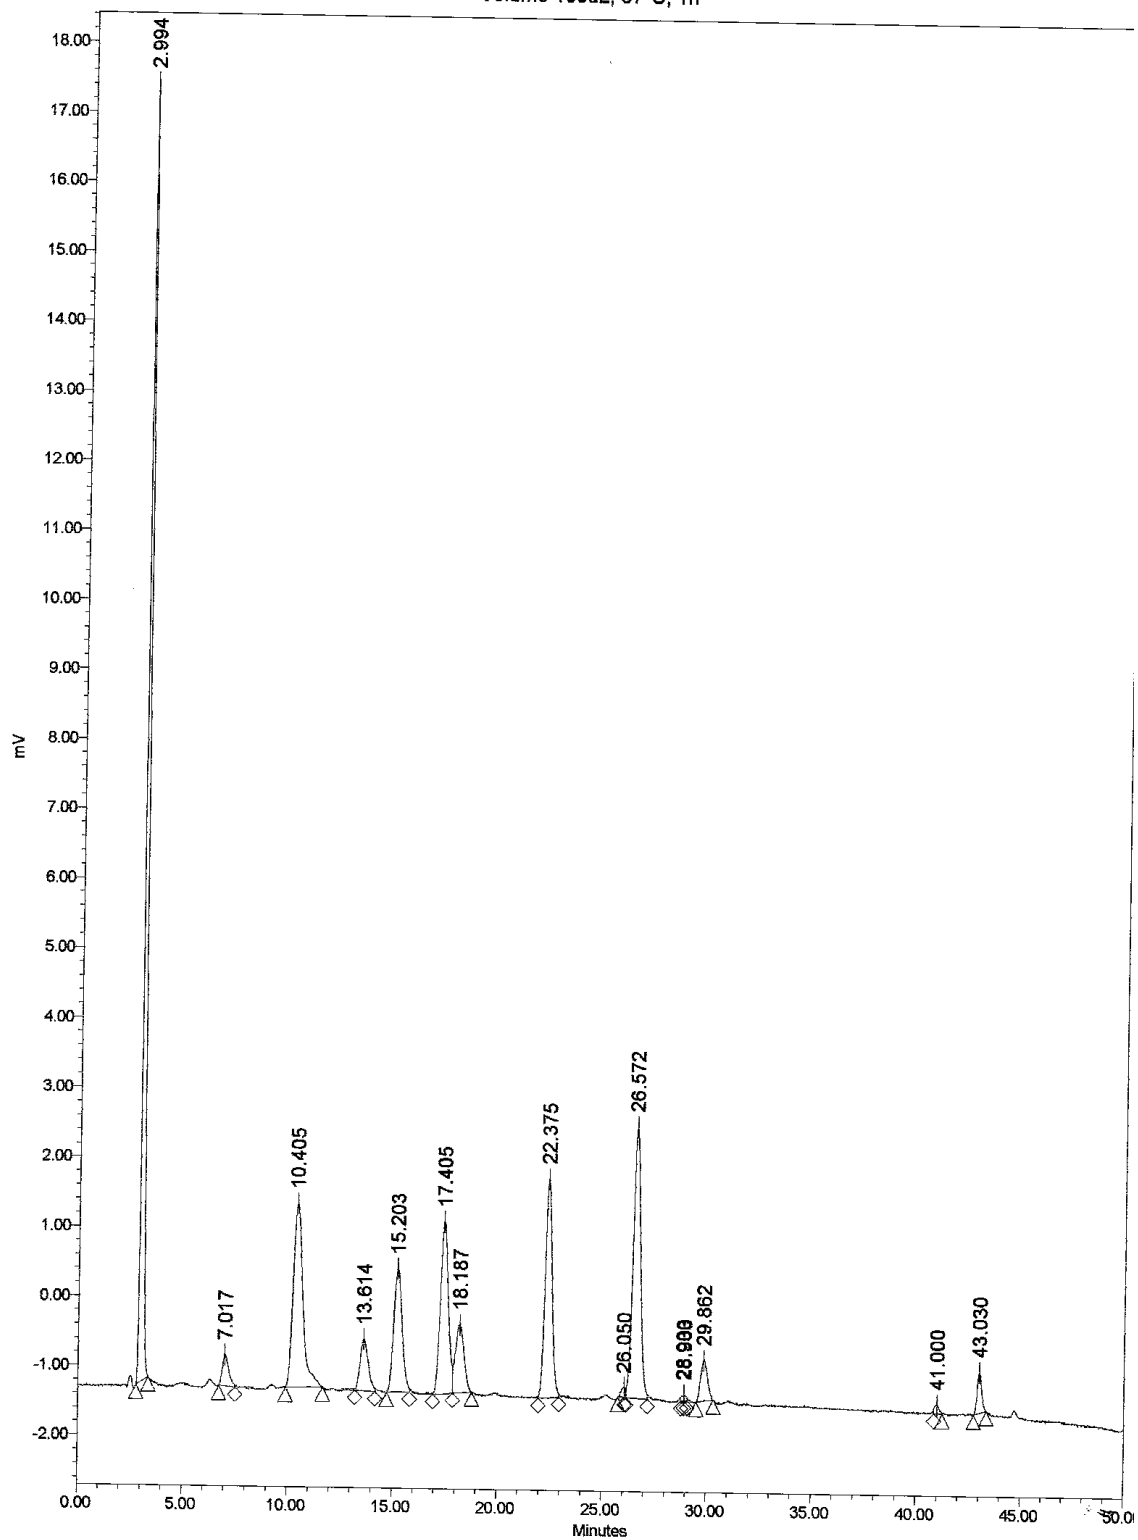

## 12. HPLC Traces for Thermolysin

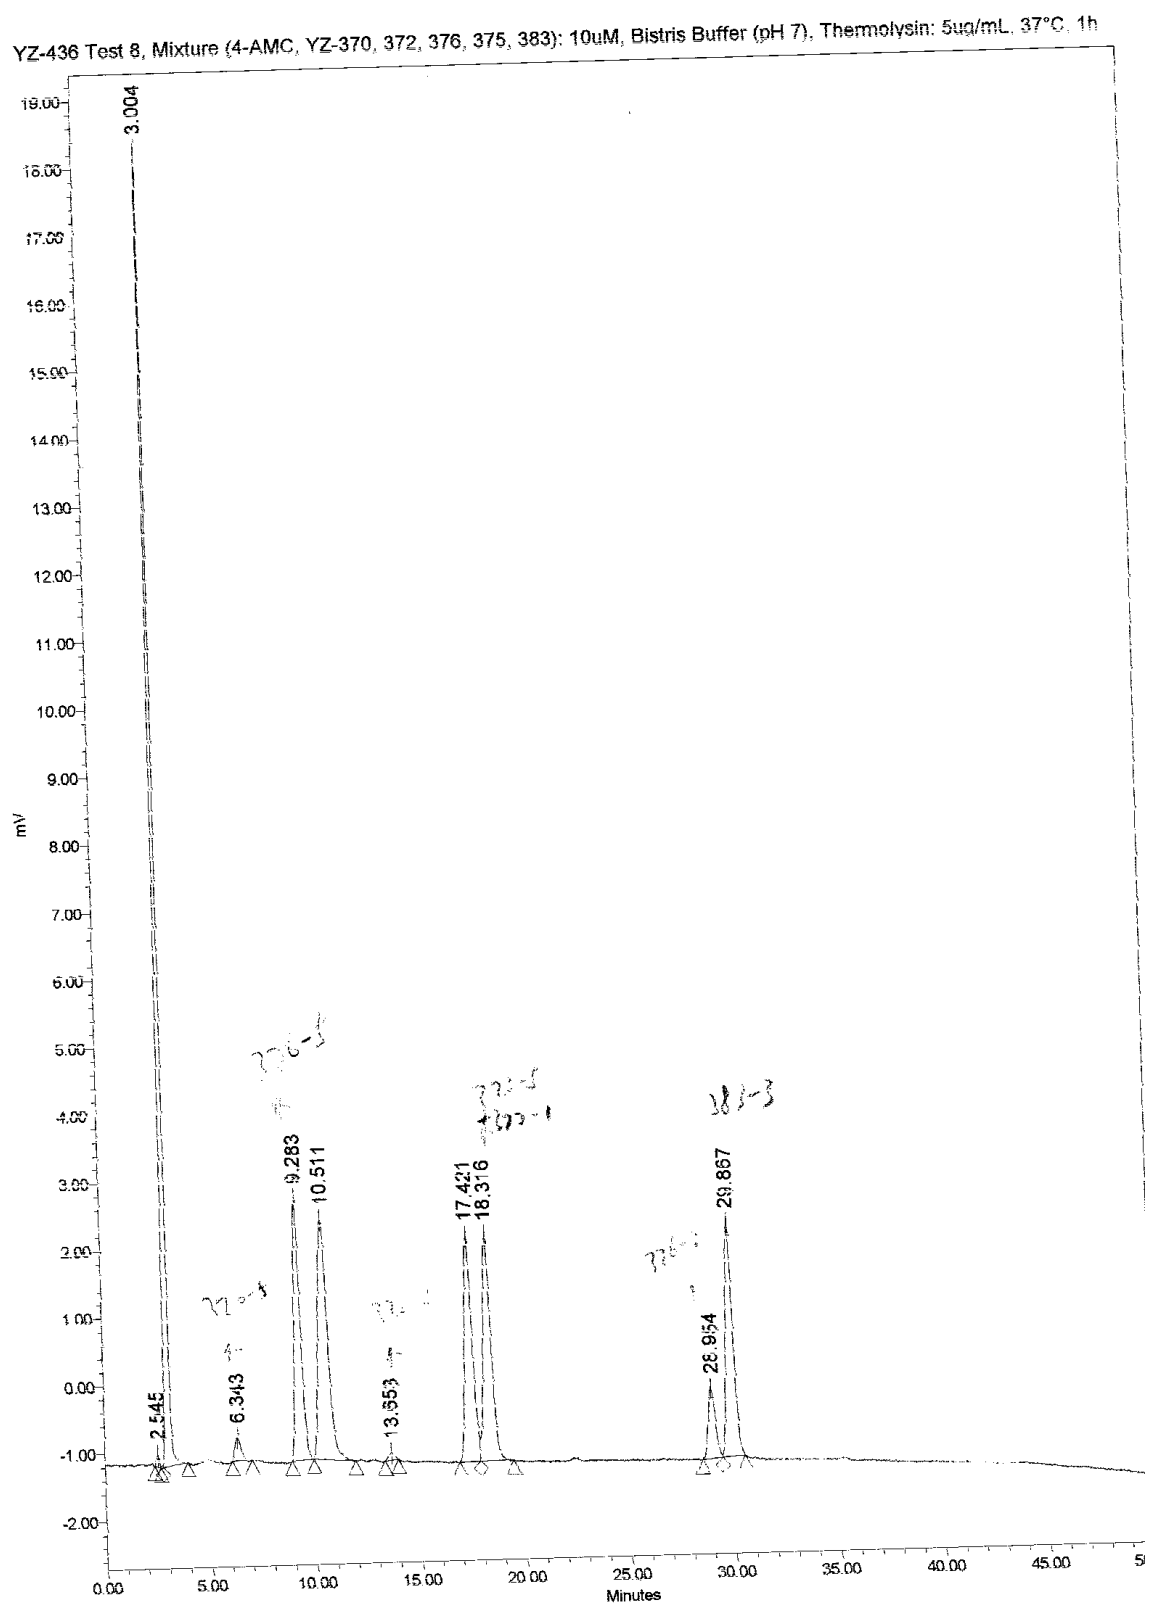

13. HPLC Traces for blank

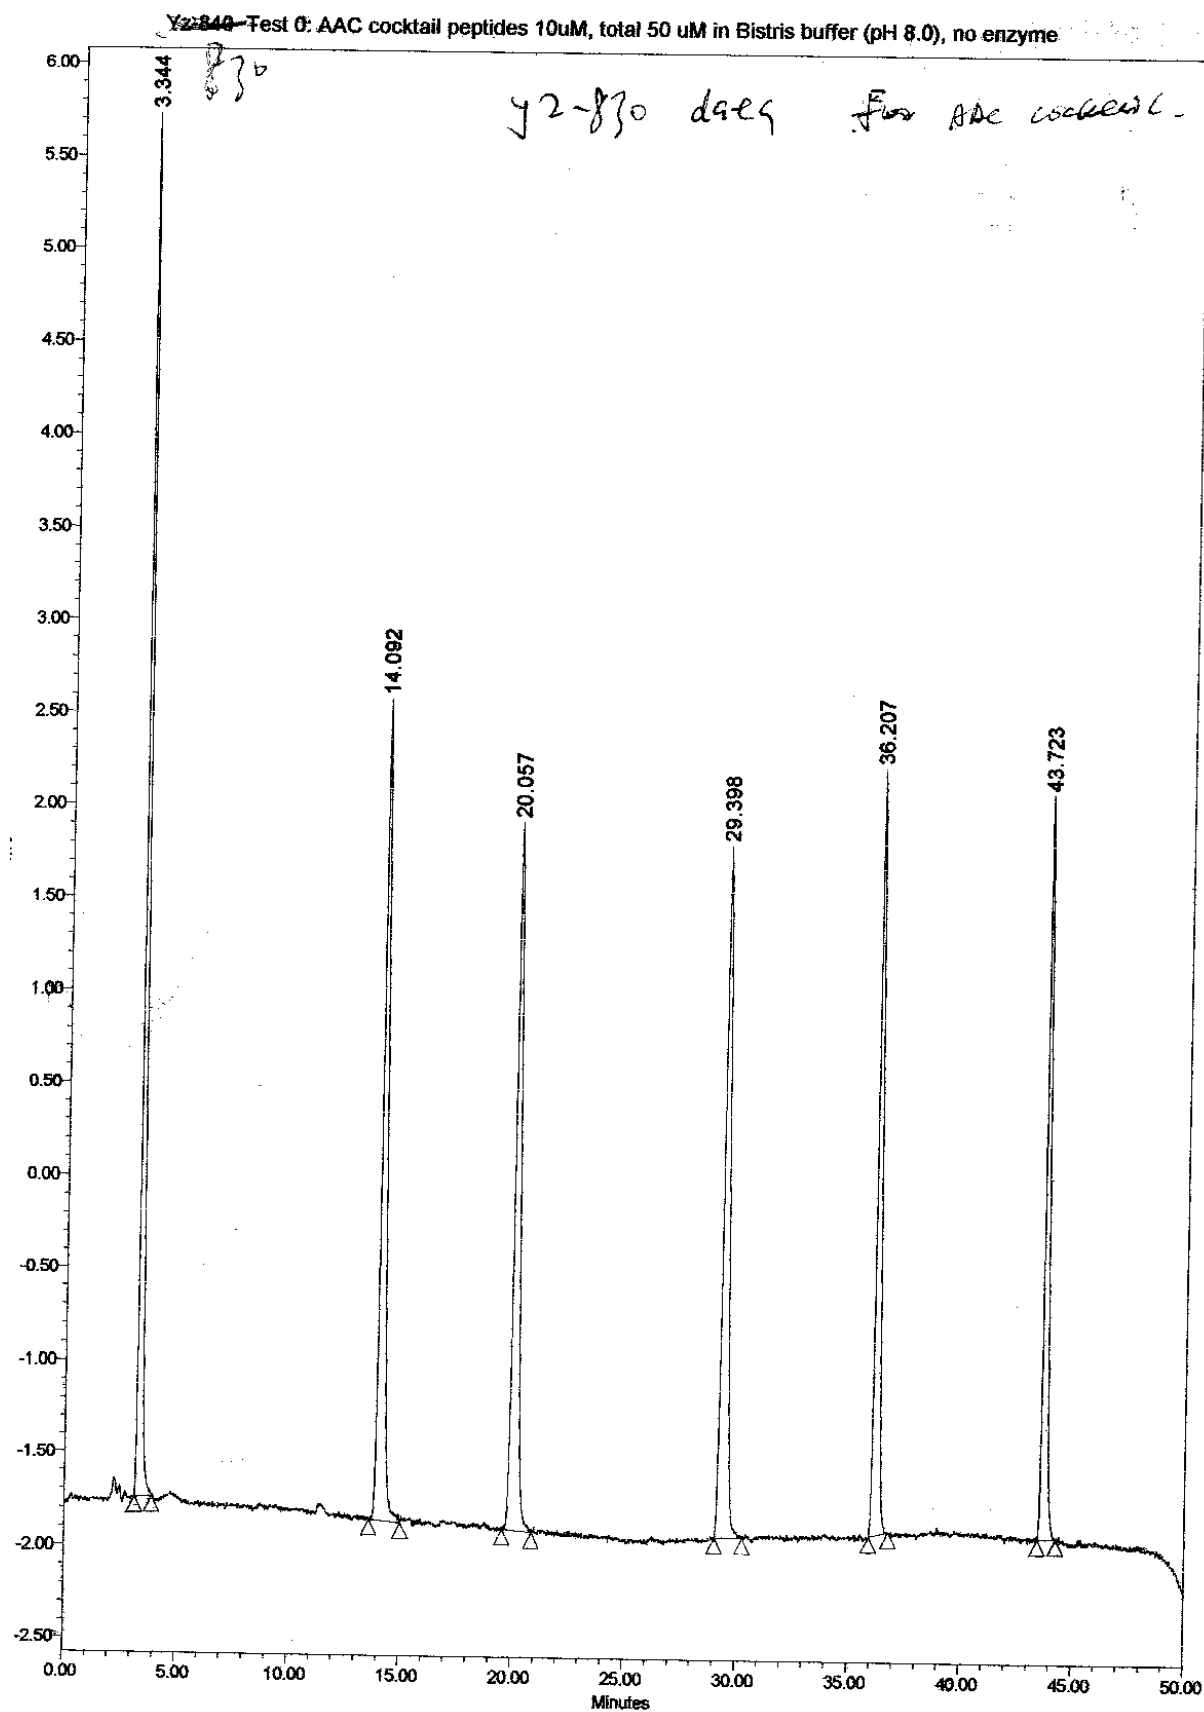

## 14. HPLC Traces for Proteinase K-1 -1h

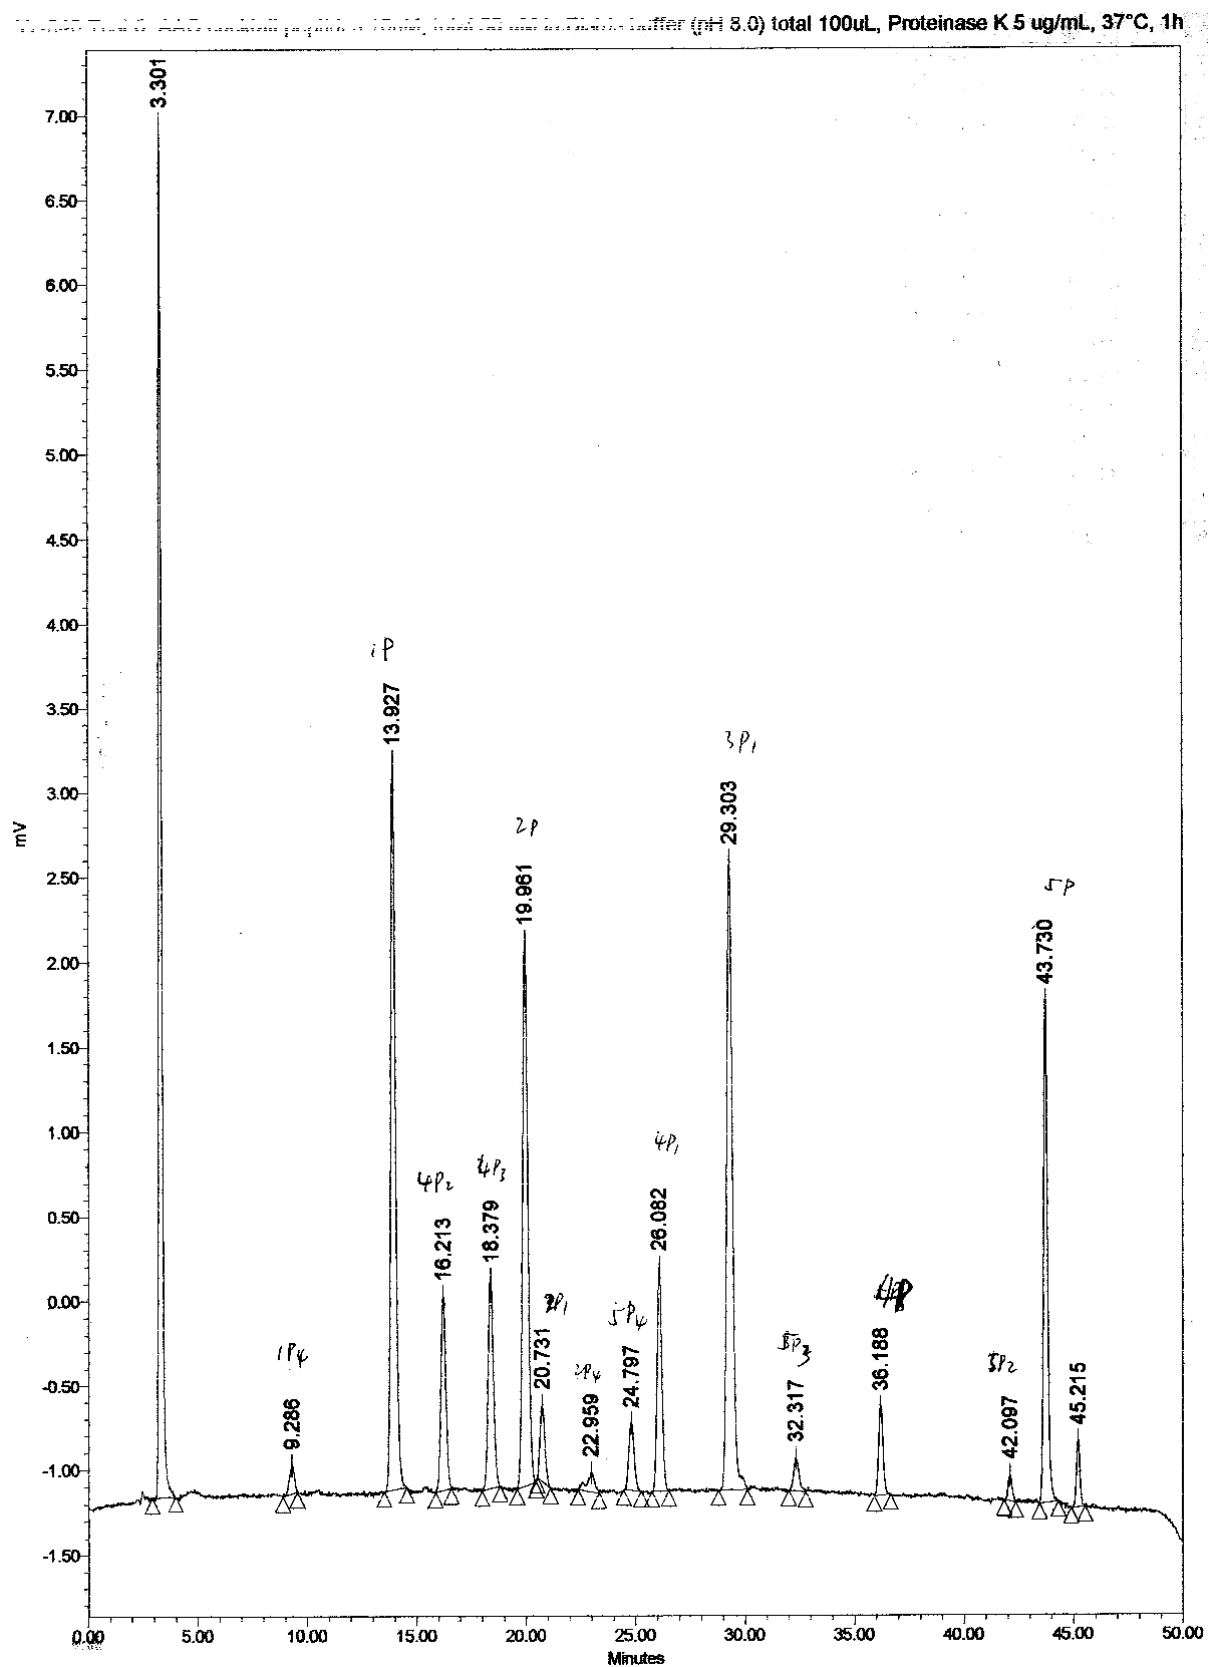

15. HPLC Traces for Subtilisin-1 -1h

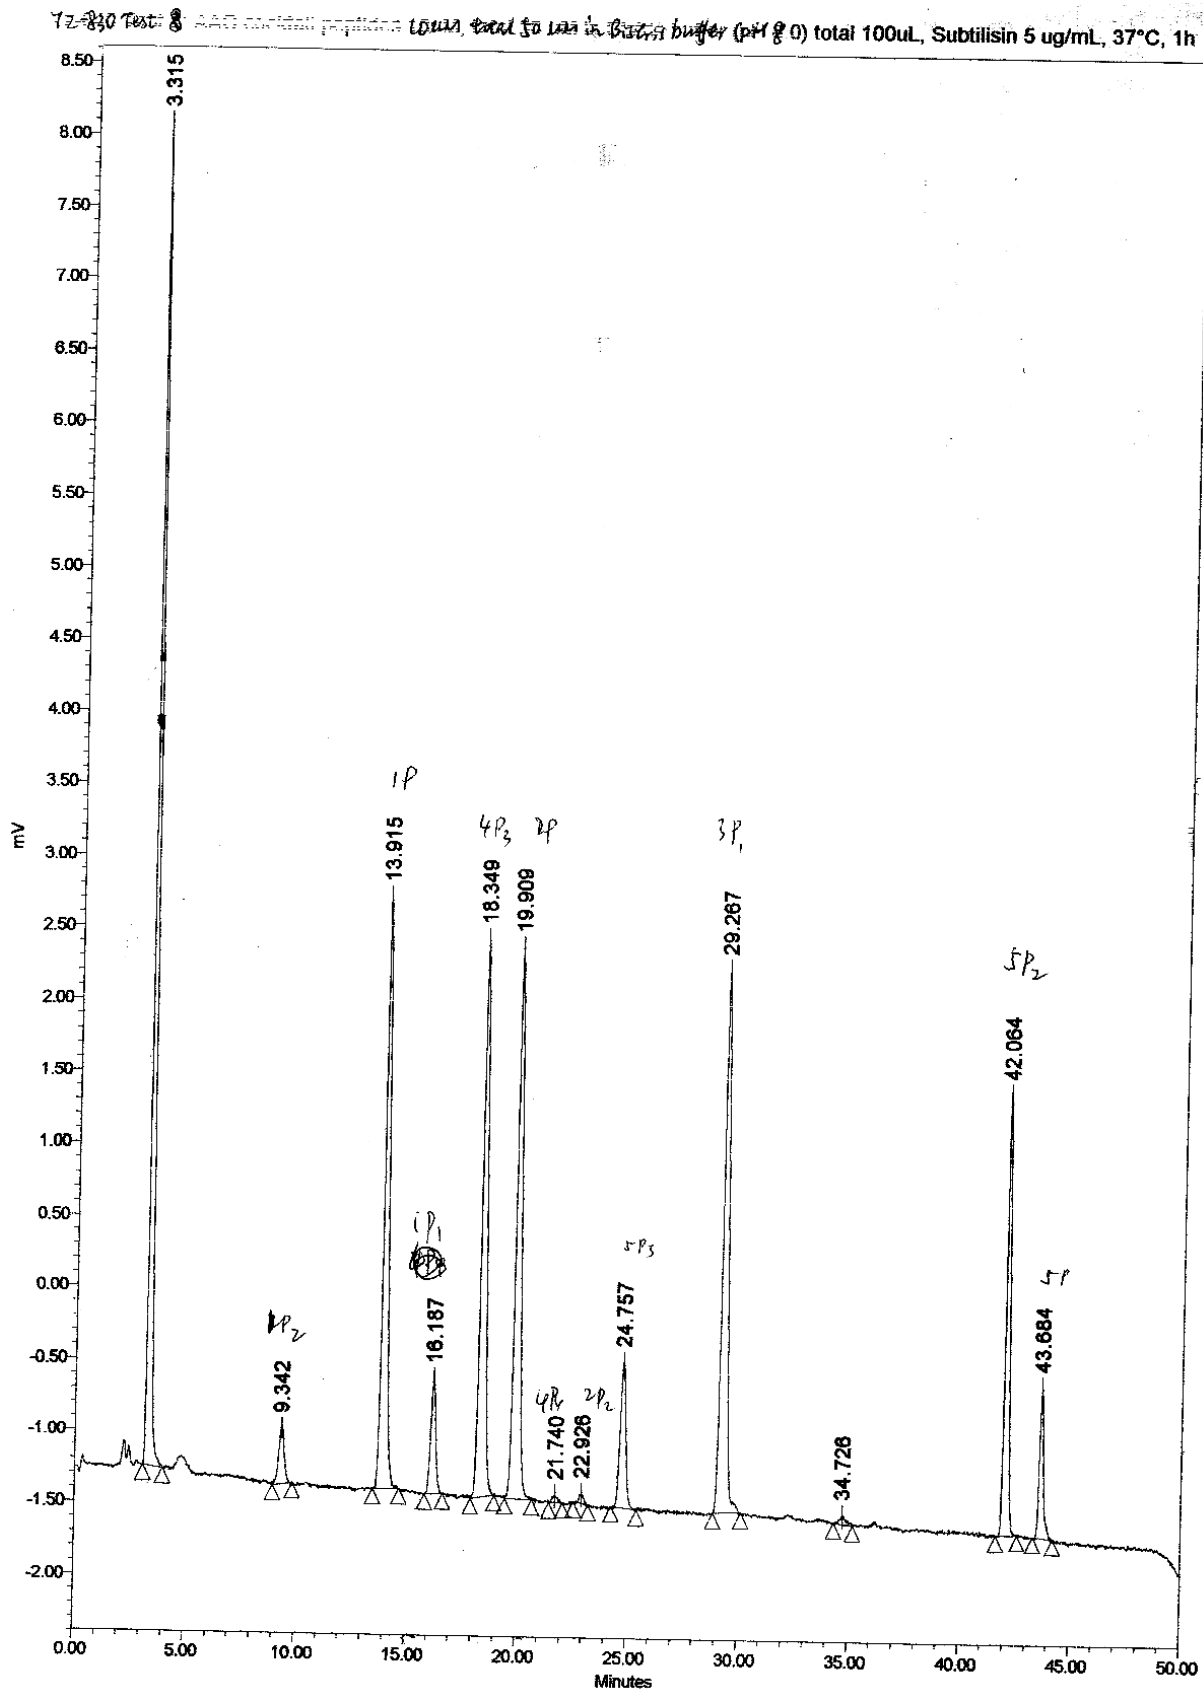





## 17. HPLC Traces for Trypsin-1 -10 min

z-340 Test 1: AAC cocktail peptides 10uM, total 50 uM in Bistris buffer (pH 8.0) total 100uL, Trypsin 5 ug/mL, 37°C, 10 min

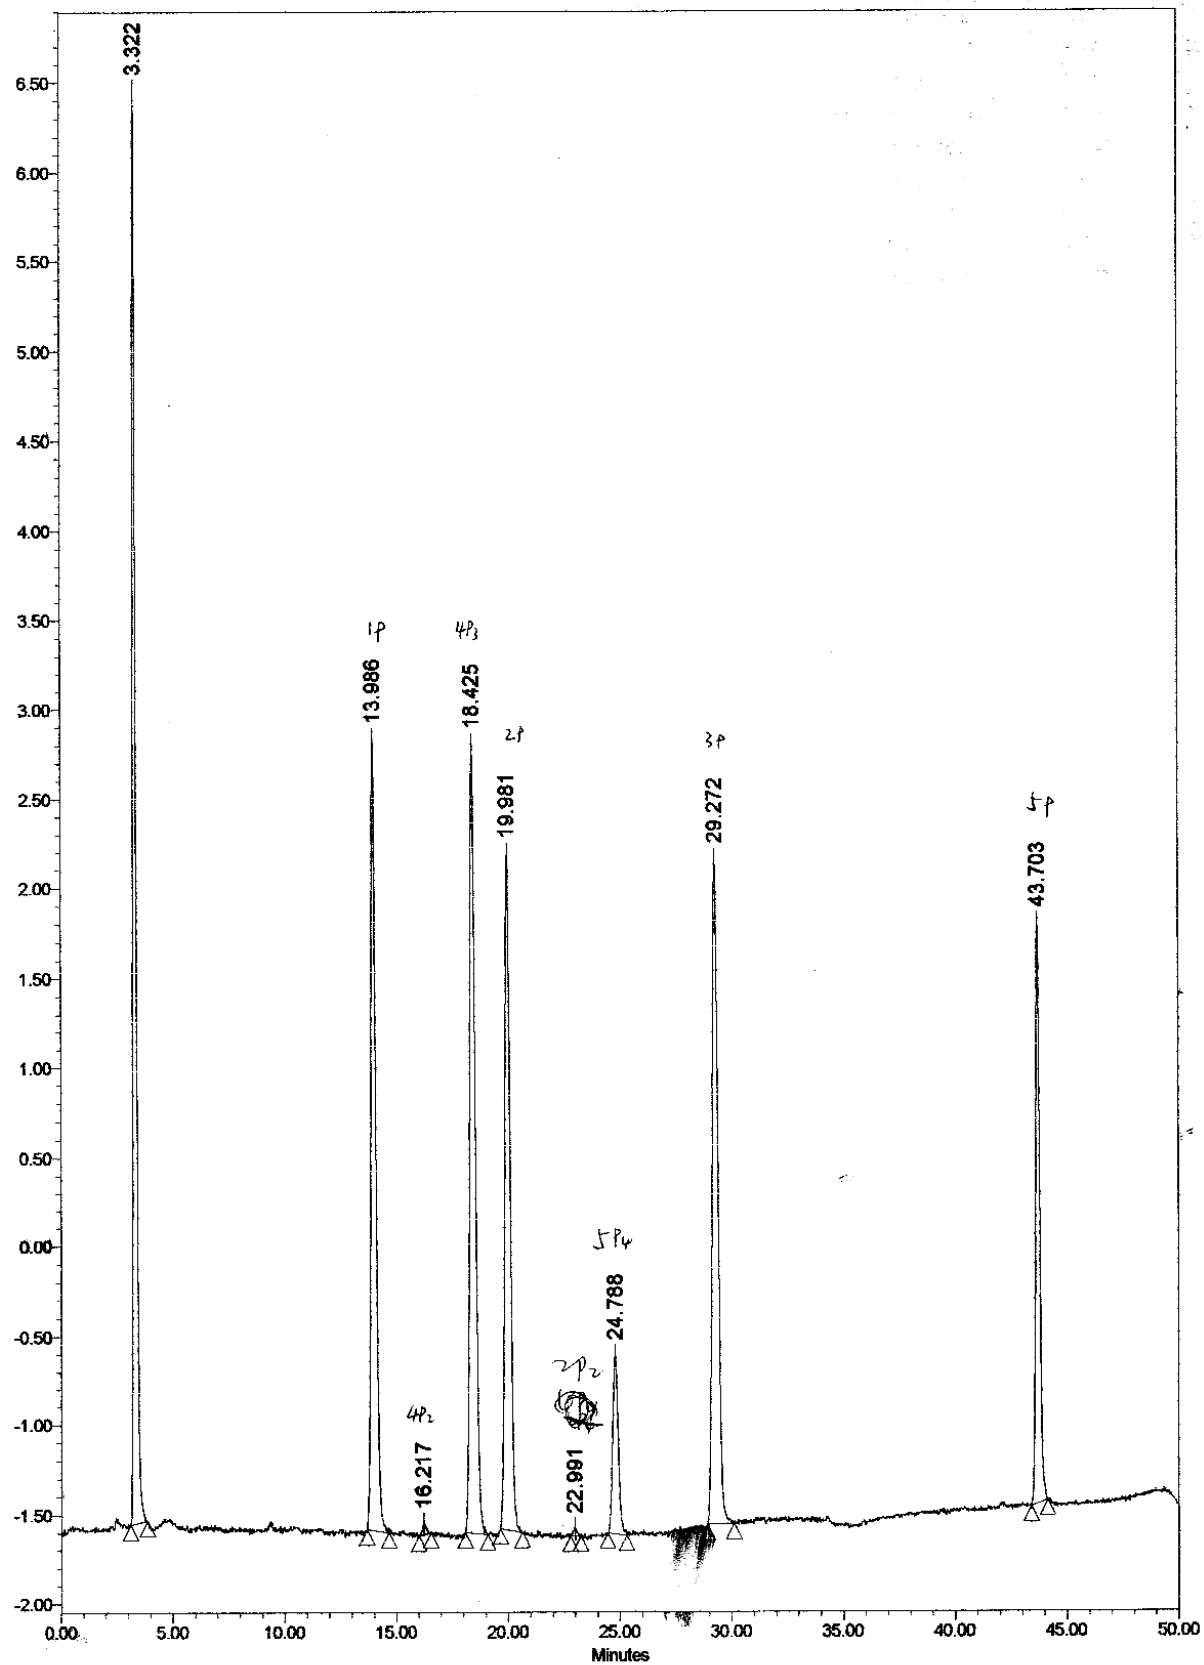

## 18. HPLC Traces for Trypsin-1 -30 min

Yz-840 Test 2: AAC cocktail peptides 10uM, total 50 uM in Bistris buffer (pH 8.0) total 100uL, Trypsin 5 ug/mL, 37°C, 0.5h

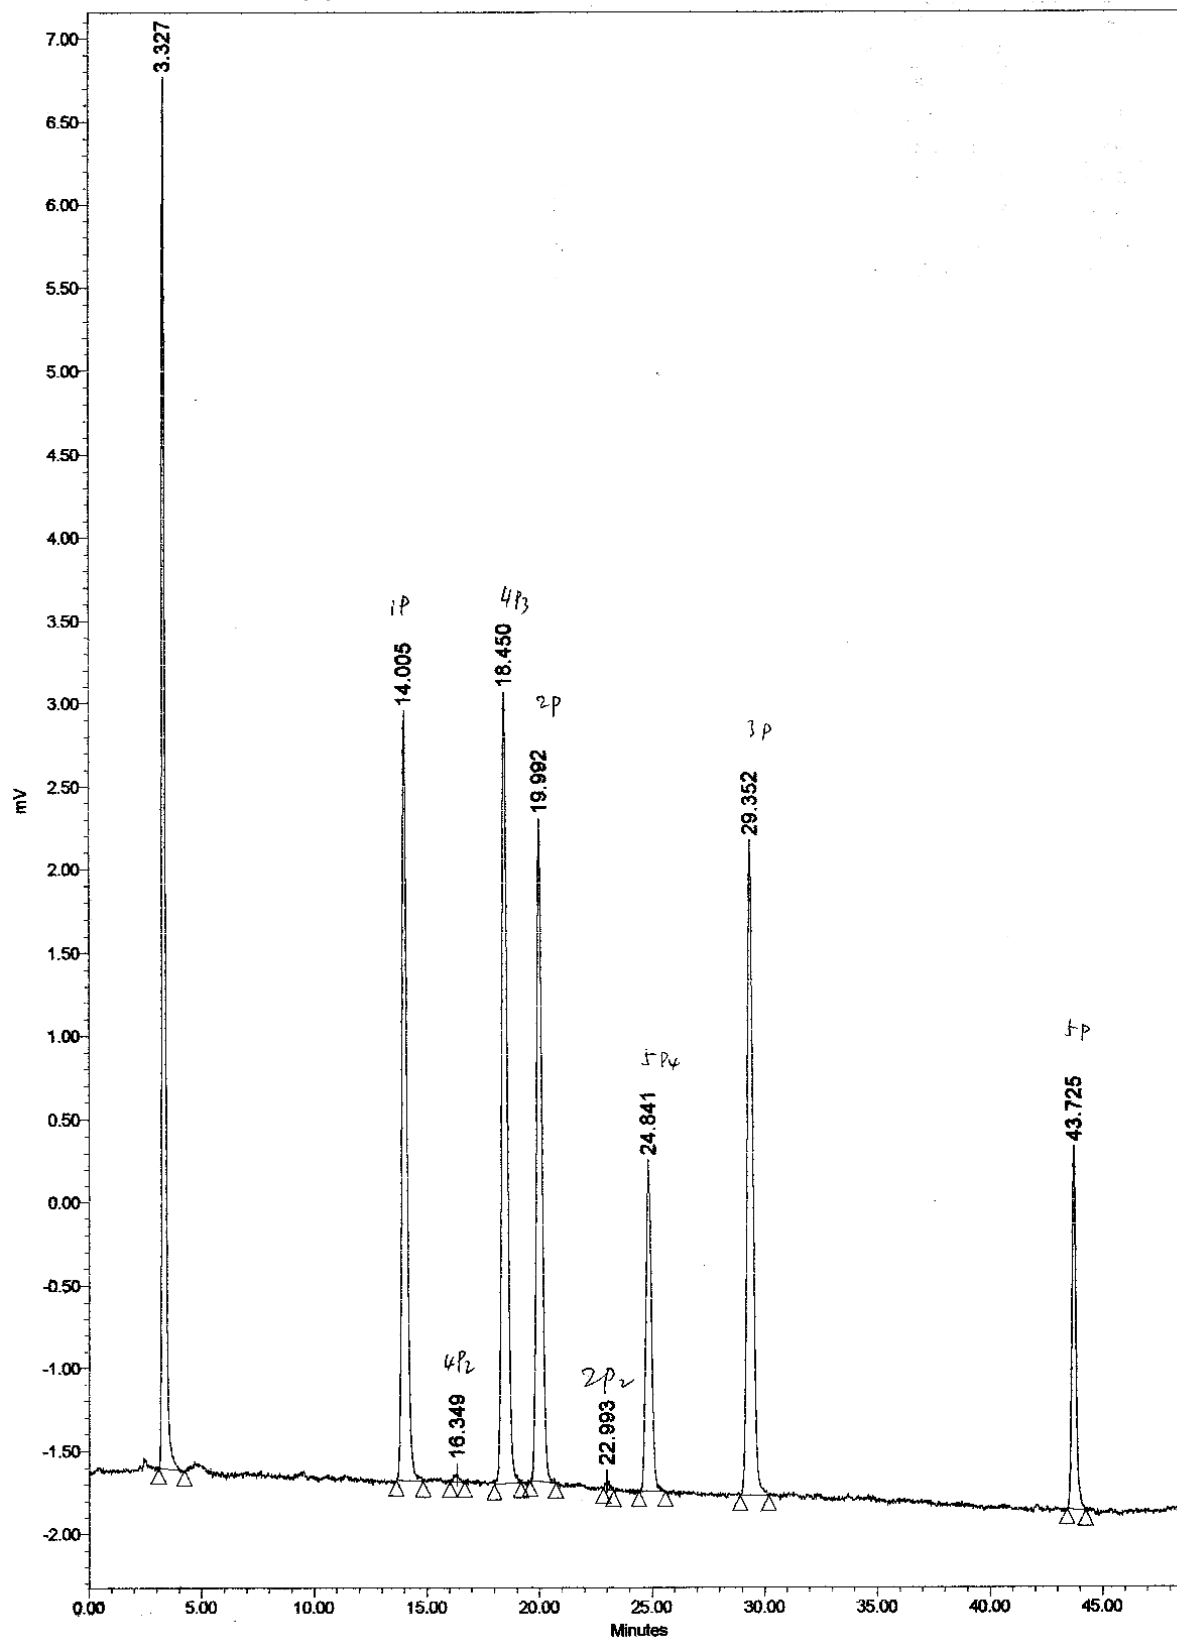

## 19. HPLC Traces for Trypsin-1 -1h

Yz-840 Test 3: AAC cocktail peptides 10uM, total 50 uM in Bistris buffer (pH 8.0) total 100uL, Trypsin 5 ug/mL, 37°C, 1h

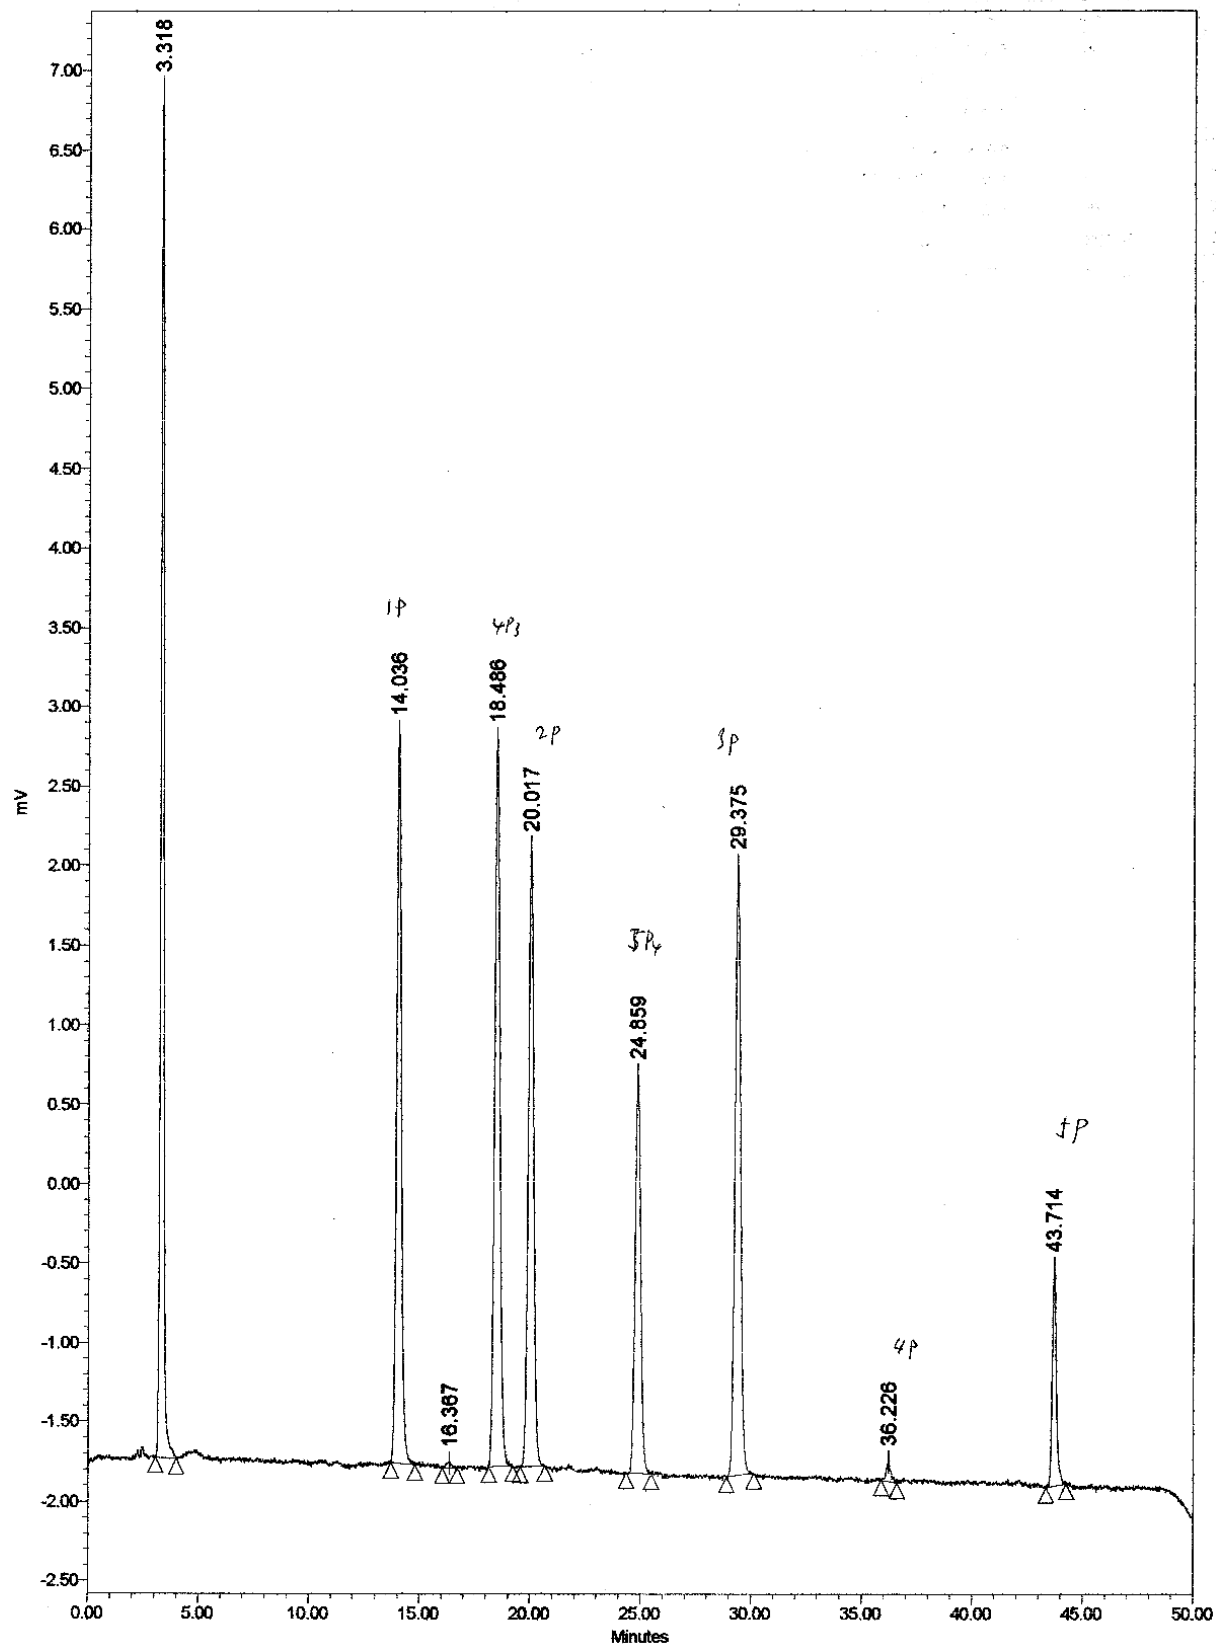

## 20. HPLC Traces for Trypsin-1 -2h

Yz-840 Test 4: AAC cocktail peptides 10uM, total 50 uM in Bistris buffer (pH 8.0) total 100uL, Trypsin 5 ug/mL, 37°C, 2h

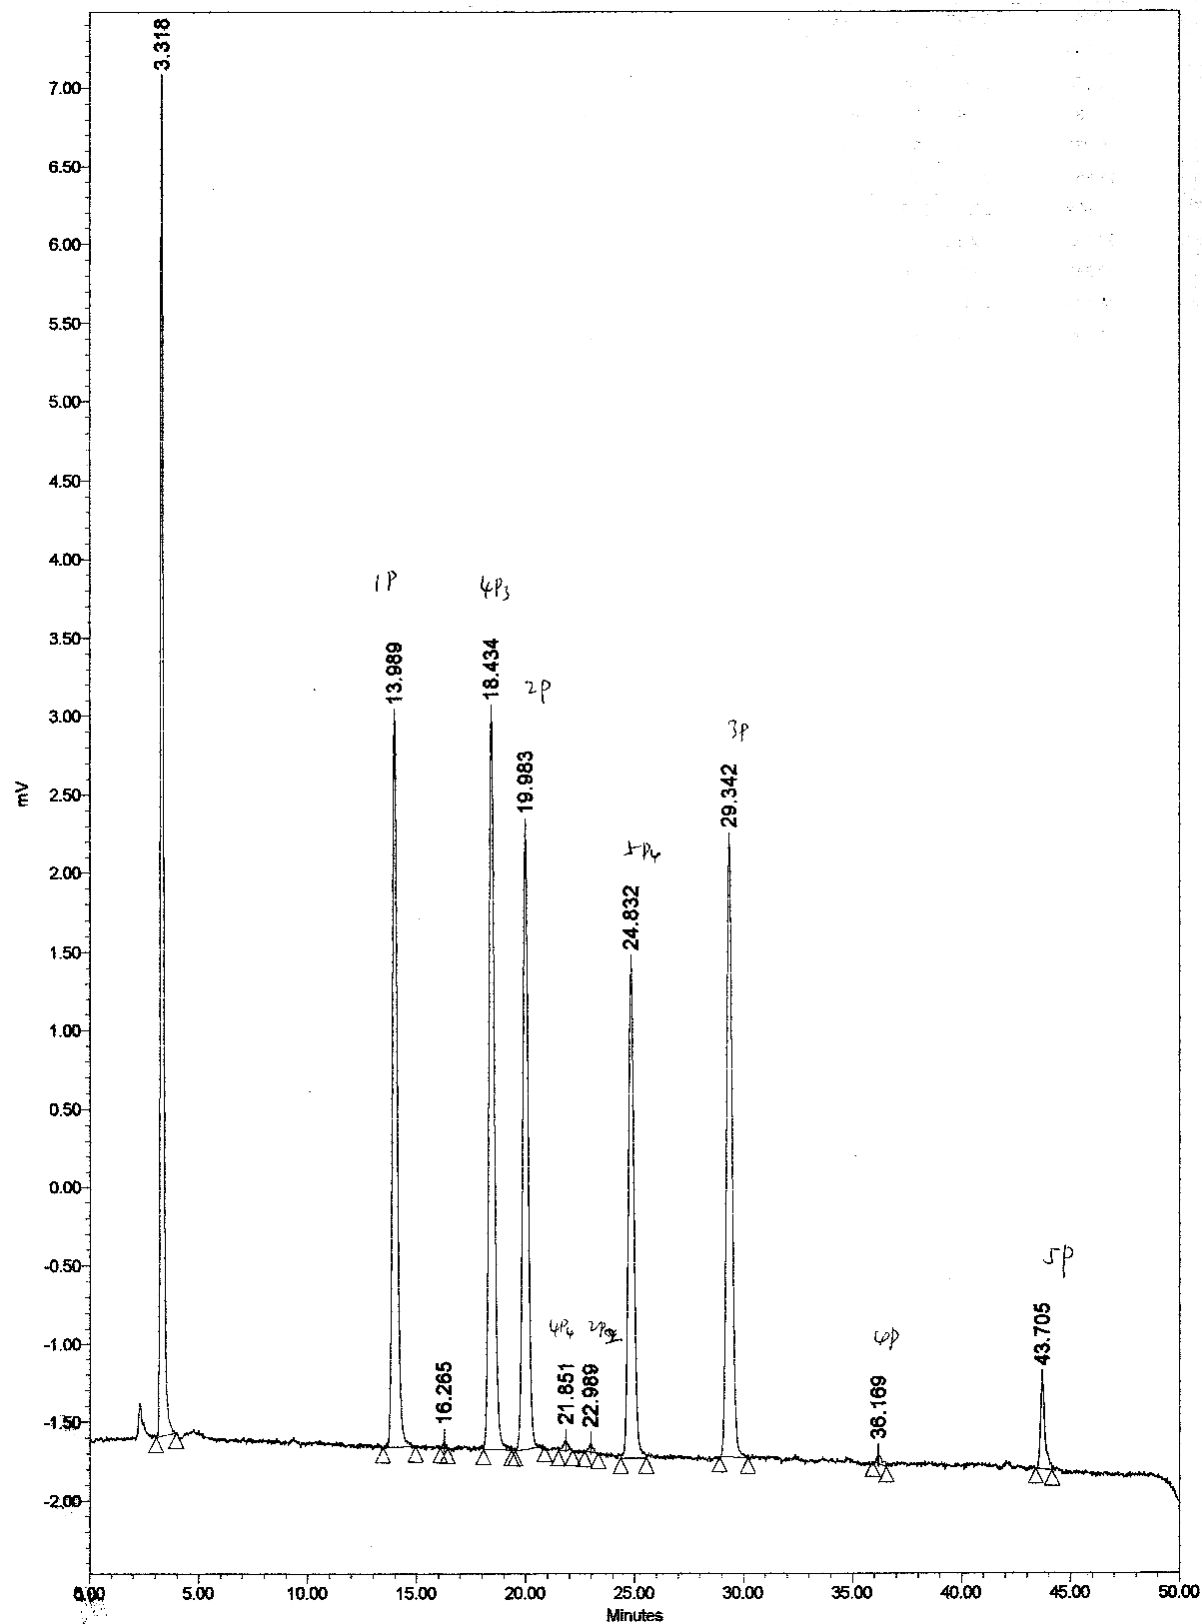



List of labeling of reference fragments (transfer from lab label)

| Fragments | Sequence       | Lab label  | Ret.T (min)  |
|-----------|----------------|------------|--------------|
| 1P5       | *K             | 370-5      | 6.86         |
| 1P2       | *KDES          | 370-2      | 6.89         |
| 1P3       | *KDE           | 370-3      | 7.23         |
| 1P4       | *KD            | 370-4      | 7.63         |
| 3P5       | *E             | 376-5      | 9.15         |
| P6        | *              | AAC        | 11.44        |
| <b>1P</b> | <b>*KDESYR</b> | <b>370</b> | <b>11.67</b> |
| 2P5       | *A             | 372-5      | 12.17        |
| 4P2       | *YARK          | 375-2      | 13.67        |
| 1P1       | *KDESYR        | 370-1      | 14.08        |
| 4P3       | *YAR           | 375-3      | 15.33        |
| <b>2P</b> | <b>*AVPERS</b> | <b>372</b> | <b>17.46</b> |
| 4P4       | *YA            | 375-4      | 18.01        |
| 2P1       | *AVPERS        | 372-1      | 18.14        |
| 4P5       | *Y             | 375-5      | 18.63        |
| 2P2       | *AVPE          | 372-2      | 19.87        |
| 2P4       | *AV            | 372-4      | 20.19        |
| 5P2       | *LKYF          | 383-2      | 22.52        |
| 2P3       | *AVP           | 372-3      | 23.39        |
| 4P1       | *YARKL         | 375-1      | 24.14        |
| <b>3P</b> | <b>*EFVGS</b>  | <b>376</b> | <b>25.14</b> |
| 3P1       | *EFVGS         | 376-1      | 26.64        |
| 3P4       | *EF            | 376-4      | 28.7         |
| 3P2       | *EFVG          | 376-2      | 28.72        |
| 5P3       | *LKY           | 383-3      | 30.12        |
| 5P5       | *L             | 383-5      | 31.01        |
| 3P3       | *EFV           | 376-3      | 32.83        |
| <b>4P</b> | <b>*YARKLF</b> | <b>375</b> | <b>34.97</b> |
| 5P1       | *LKYFD         | 383-1      | 39.02        |
| 5P4       | *LK            | 383-4      | 41.05        |
| <b>5P</b> | <b>*LKYFDI</b> | <b>383</b> | <b>43.02</b> |
